# Supplementary material
Source: PubMed Central journal article supplement (PMC5380219)
Supplement: NIHMS70615-supplement-Supplementary_Material.pdf [file NIHMS70615-supplement-Supplementary_Material.pdf]

## SUPPLEMENTARY MATERIAL

### **RPL5 on 1p22 is recurrently deleted in multiple myeloma and its expression is linked to bortezomib response**

Isabel JF Hofman<sup>1</sup>, Mark Van Duin<sup>2</sup>, Elke De Bruyne<sup>3</sup>, Laura Fancello<sup>1</sup>, George Mulligan<sup>4</sup>, Ellen Geerdens<sup>5,6</sup>, Emanuela Garelli<sup>7</sup>, Cecilia Mancini<sup>8</sup>, Heidi Lemmens<sup>9</sup>, Michel Delforge<sup>9</sup>, Peter Vandenberghe<sup>9</sup>, Iwona Wlodarska<sup>5</sup>, Anna Aspesi<sup>10</sup>, Lucienne Michaux<sup>9</sup>, Karin Vanderkerken<sup>3</sup>, Pieter Sonneveld<sup>2</sup>, Kim De Keersmaecker<sup>1</sup>

<sup>1</sup> KU Leuven - University of Leuven, Department of Oncology, LKI - Leuven Cancer Institute, Leuven, Belgium

<sup>2</sup> Department of Hematology, Erasmus Medical Center, Rotterdam, The Netherlands

<sup>3</sup> Department of Hematology and Immunology, Myeloma Center Brussels, Vrije Universiteit Brussels (VUB), Brussels, Belgium

<sup>4</sup> Takeda Pharmaceuticals International Co., Cambridge, MA, USA

<sup>5</sup> KU Leuven - University of Leuven, Center for Human Genetics, LKI - Leuven Cancer Institute, Leuven, Belgium

<sup>6</sup> VIB Center for the Biology of Disease, Leuven, Belgium

<sup>7</sup> Dipartimento Scienze della Sanità Pubblica e Pediatriche, Univ.Torino, Torino, Italy

<sup>8</sup> Dipartimento di Scienze Mediche, Univ.Torino, Torino, Italy

<sup>9</sup> Center for Human Genetics, University Hospitals Leuven, Leuven, Belgium

<sup>10</sup> Department of Health Sciences, Universita' del Piemonte Orientale, Novara, Italy

### **Supplementary Methods**

#### **Fluorescent in situ hybridization (FISH)**

FISH was performed according to standard procedures. All UZ Leuven cases are routinely characterized by FISH, as described previously.<sup>1</sup> In addition, the *RPL5* locus was examined with two bacterial artificial chromosome (BAC) clones covering and flanking the gene, RP11-1E09 and RP11-456E23, selected from [www.ensembl.org](http://www.ensembl.org). The clones were directly labeled with Spectrum Orange- or Spectrum Green-deoxyuridine triphosphate (dUTP) (Abbott Molecular) using random priming. Up to 100 plasma cells were evaluated in each experiment. FISH images were acquired with a fluorescence microscope equipped with an Axiophot 2 camera (Carl Zeiss Microscopy) and a MetaSystems ISIS imaging system (MetaSystems).

#### **Analysis of mutation load of 1p22.1 genes**

This analysis was done on the MMRC sequence dataset of 203 patients.<sup>2</sup> A mutation score was assigned to each 1p22.1 gene by multiplying the gene length corrected mutation count by a score measuring functional impact of the mutations. This functional score was calculated using TRansFIC.<sup>3</sup> Mutations with low, median and high impact as predicted by TRansFIC were given a weight of 0.25, 0.5 and 1 respectively, and scores calculated by the siftTRansFIC and pp2TRansFIC algorithms were averaged. Finally, scores for the different mutations in a gene were averaged to obtain the final functional impact score (Supplementary tables 4+5).

### **Multiplex ligation-dependent probe amplification (MLPA) assay**

The SALSA MLPA P212 DBA probemix (MRC-Holland) was used. Probes targeting *RPL5* are indicated in Figure 1E.

### **Optimal cutoff analysis**

ROC analysis for bortezomib response based on *RPL5* expression was run using GraphPad Prism. Optimal cutoff was determined by calculating Youden's J-statistic (Supplementary figure 4). Optimal cutoff for survival curves was determined using the online tool Cutoff Finder<sup>4</sup> (Supplementary figure 3).

### **Supplementary References**

1. Put N, Lemmens H, Wlodarska I, et al. Interphase fluorescence in situ hybridization on selected plasma cells is superior in the detection of cytogenetic aberrations in plasma cell dyscrasia. *Genes Chromosomes Cancer*. 2010;49(11):991-7-997.
2. Lohr JG, Stojanov P, Carter SL, et al. Widespread Genetic Heterogeneity in Multiple Myeloma: Implications for Targeted Therapy. *Cancer Cell*. 2014;25(1):91-101
3. Gonzalez-Perez A, Deu-Pons J, Lopez-Bigas N. Improving the prediction of the functional impact of cancer mutations by baseline tolerance transformation. *Genome Med*. 2012.
4. Budczies J, Klauschen F, Sinn BV, Gyoerffy B, Schmitt WD, Darb-Esfahani S et al. Cutoff Finder: A Comprehensive and Straightforward Web Application Enabling Rapid Biomarker Cutoff Optimization. *PloS one* 2012; 7: e51862.

# Supplementary Figures

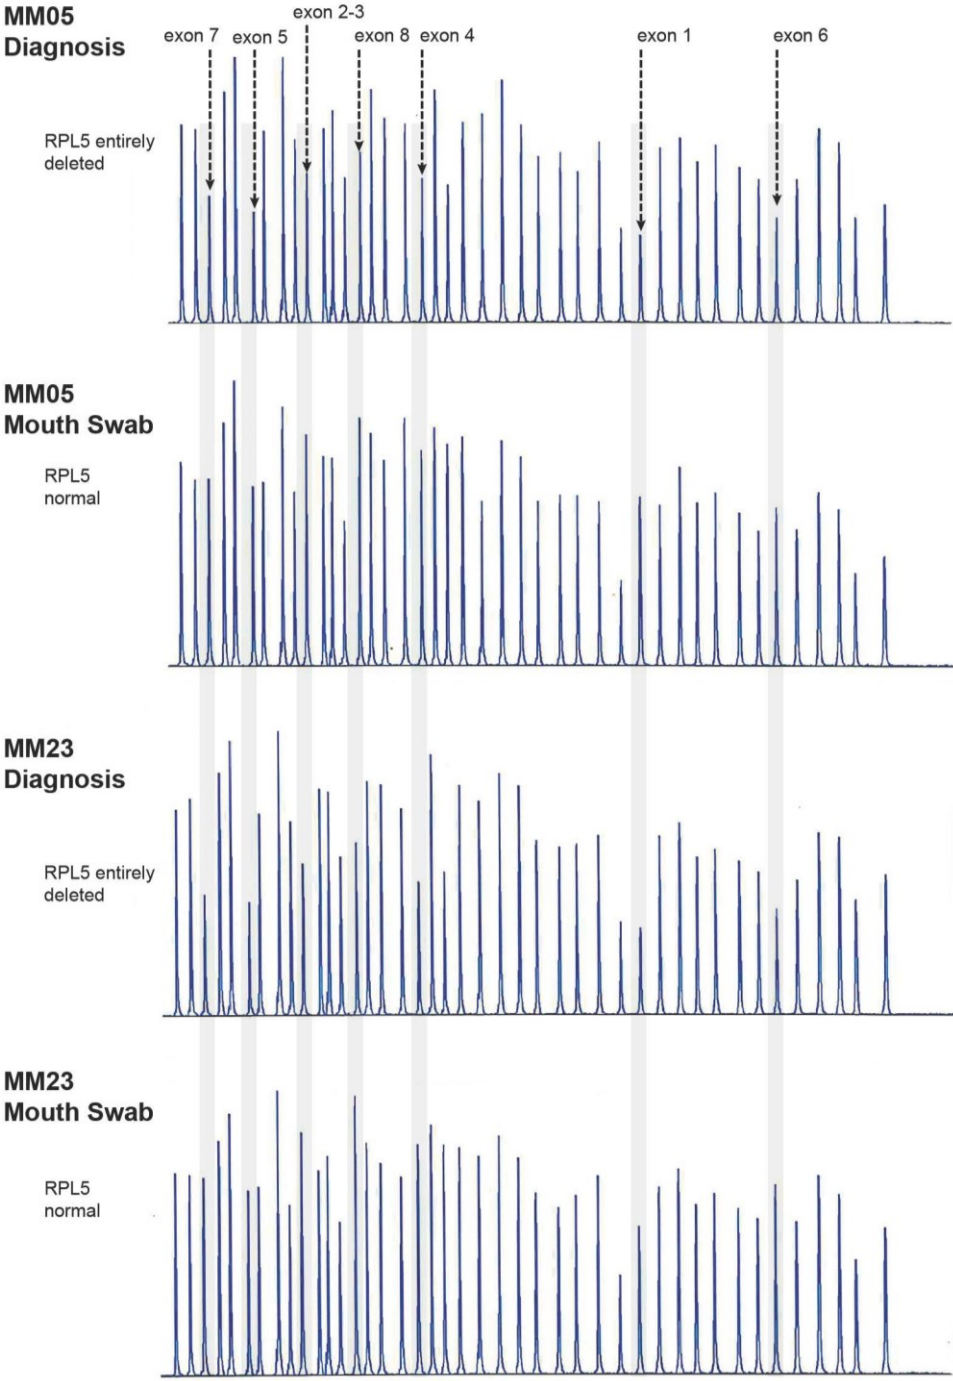

**Supplementary Figure 1. Confirmation of somatic status of the deletions by MLPA assay.** MLPA was performed on paired diagnostic and mouth swab samples of two patients that showed deletions on the copy number arrays (MM05 and MM23). In both cases, the deletion was confirmed to be somatic.

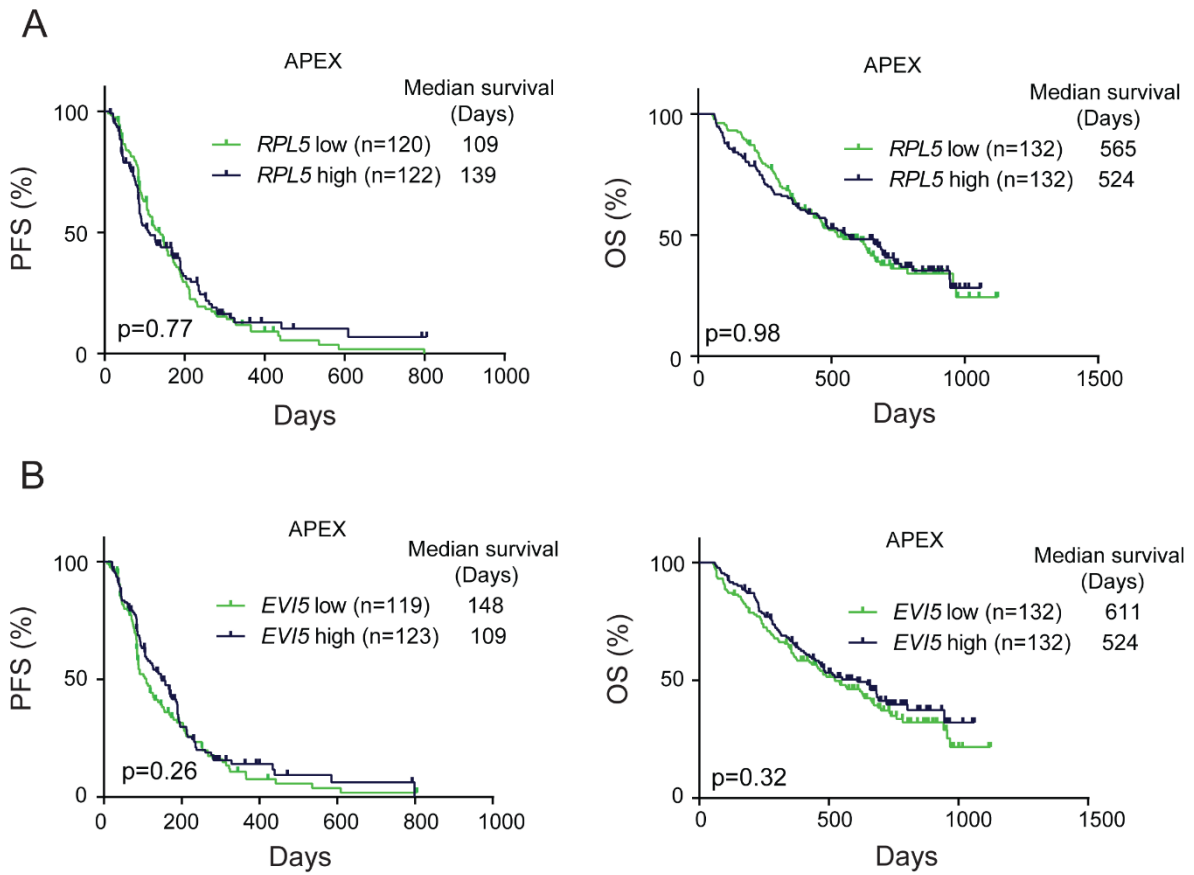

**Supplementary Figure 2. Low *EVI5* and *RPL5* expression does not correlate with shorter PFS and OS in relapse patients.**

(A) Kaplan-Meier curves comparing PFS (left) and OS (right) of *RPL5* low and high expressing cases in the APEX trial. (B) PFS and OS of *EVI5* low and high expressing cases in the APEX trial. Low and high expression are defined here as below and above median. P-values were calculated with Log-rank tests.

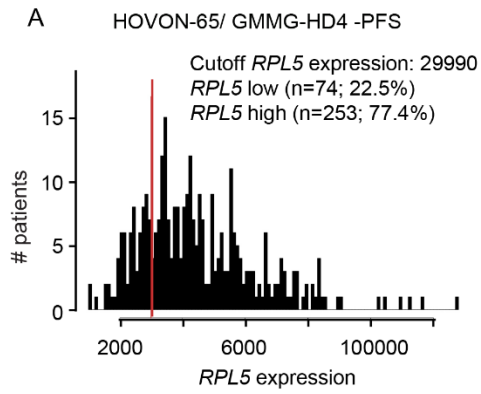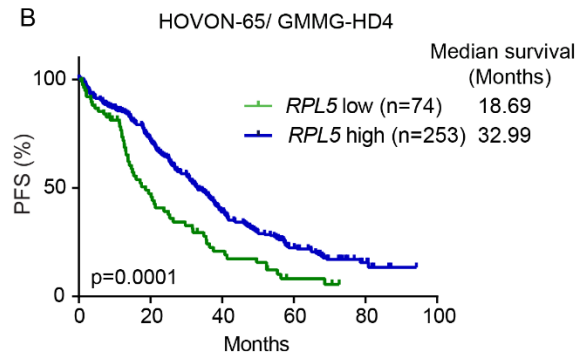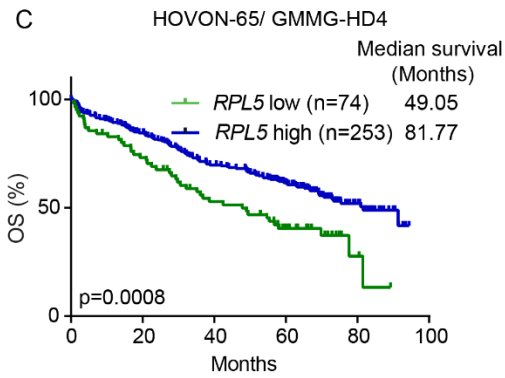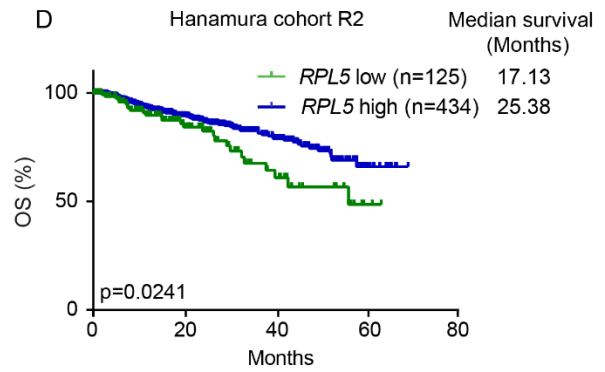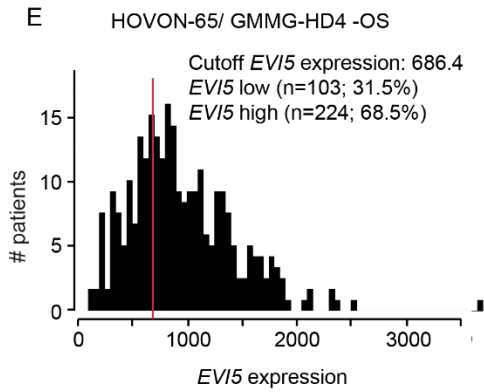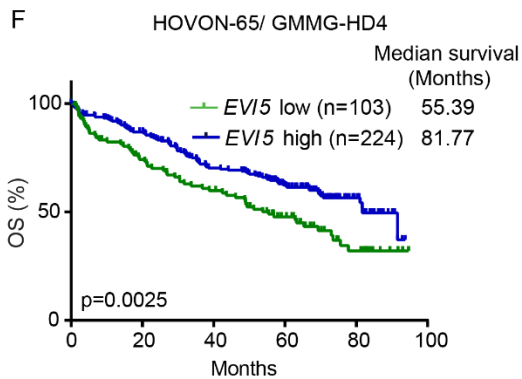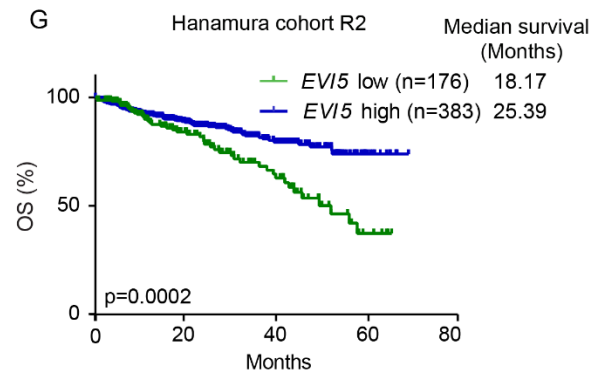

**Supplementary Figure 3. Kaplan-Meier curves for survival stratified by the optimal expression threshold of *RPL5* or *EVI5*.**

(A) Threshold analysis using the Cutoff Finder tool to determine the optimal *RPL5* expression cutoff for survival. Shown here is the optimal *RPL5* expression threshold for PFS in the HOVON-65 trial which is determined at the 22.5% lowest *RPL5* expressers. (B and C) Kaplan-Meier curves based on optimal cutoff of *RPL5* expression for PFS (B) and OS (C) in the HOVON-65 trial. (D) Validation of the *RPL5* expression cutoff of 22.5% lowest expressers on the OS data from the Hanamura cohort available in the R2: Genomics Analysis and Visualization Platform confirms statistical significant separation of OS. (E) Optimal cutoff analysis using Cutoff Finder determines the optimal *EVI5* expression cutoff for OS in the HOVON-65 trial at the 31.5% lowest *EVI5* expressers. (F and G) Kaplan-Meier curves based on optimal cutoff of *EVI5* expression in the HOVON-65 trial (F) and validation in the Hanamura cohort (G). P-values were calculated using Log-rank tests.

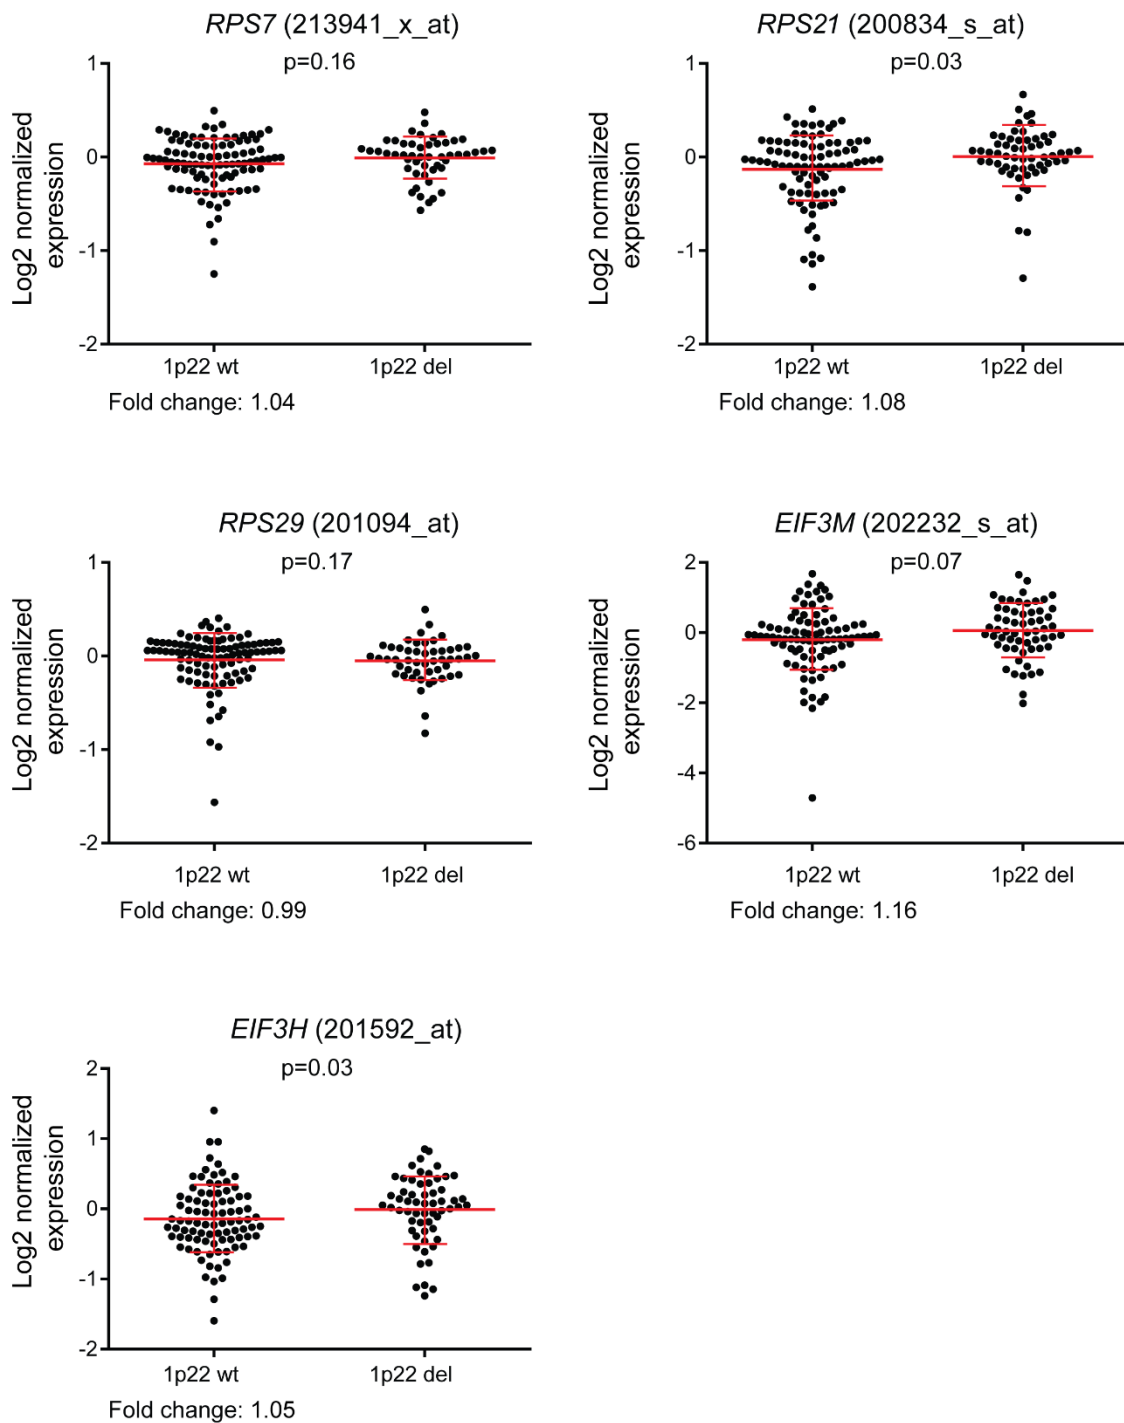

**Supplementary Figure 4. Expression levels of other ribosomal protein and translation genes besides *RPL5* in 1p22 deleted versus non-deleted cases.**

Gene expression plots of the indicated genes in 1p22 wt versus deleted cases. The red horizontal lines indicate the average value and standard deviation in the group. P-values were calculated using a 2-tailed Mann-Whitney test. Fold changes in expression between 1p22 wt and deleted cases are reported below each of the plots. Data come from the MMRC cohort.

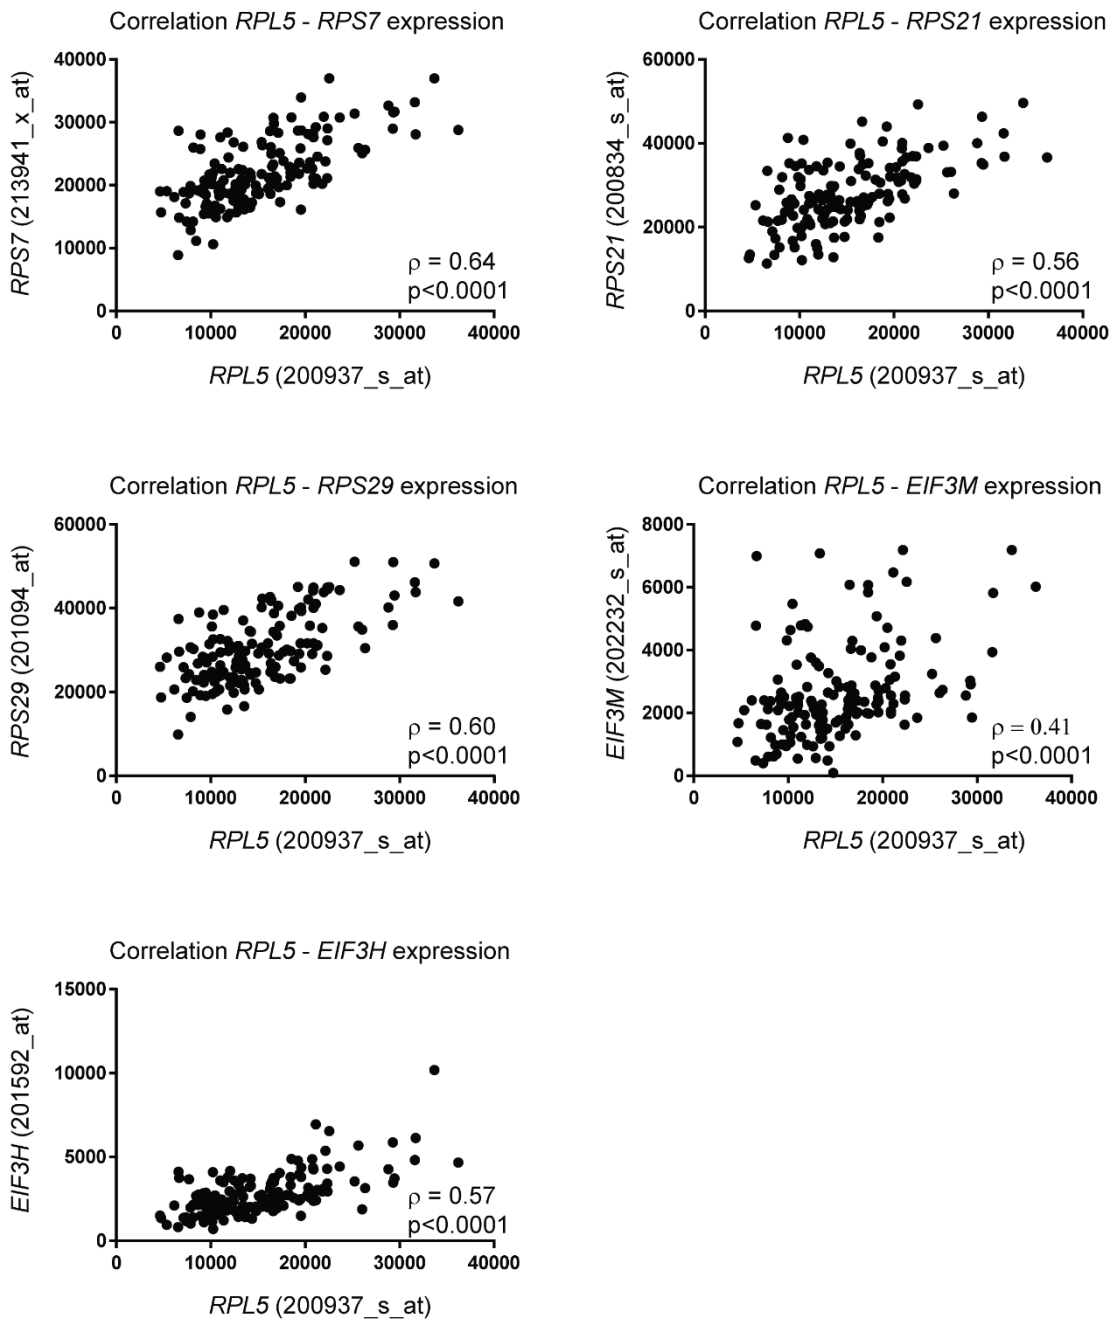

**Supplementary Figure 5. Correlation between expression levels of *RPL5* and other ribosomal protein and translation genes.**

Dot plots representing GCRMA normalized expression values for the indicated probesets. Correlation was assessed by calculating  $r$  and  $p$ -values using the Spearman method. Data come from the MMRC cohort. Standard deviations: *RPS7* (5320); *RPL5* (6210); *RPS21* (7903); *RPS29* (8279); *EIF3M* (1527); *EIF3H* (1334).



**A**  
Survival

| HOVON65     | PFS    |             |         |              | OS     |             |         |              | APEX  | PFS    |             |         |     | OS     |             |         |     |
|-------------|--------|-------------|---------|--------------|--------|-------------|---------|--------------|-------|--------|-------------|---------|-----|--------|-------------|---------|-----|
|             | exp(B) | 95% CI      | p-value | FDR          | exp(B) | 95% CI      | p-value | FDR          |       | exp(B) | 95% CI      | p-value | FDR | exp(B) | 95% CI      | p-value | FDR |
| RPS21       | 0.812  | 0.71 - 0.94 | 0.004   | <b>0.012</b> | 0.834  | 0.70 - 1.00 | 0.046   | 0.081        | RPS21 | ---    | ---         | ---     | --- | ---    | ---         | ---     | --- |
| <b>RPL5</b> | 0.805  | 0.70 - 0.93 | 0.003   | <b>0.012</b> | 0.775  | 0.65 - 0.93 | 0.006   | <b>0.036</b> | RPL5  | 0.986  | 0.85 - 1.14 | 0.848   | NA  | 1.033  | 0.89 - 1.21 | 0.677   | NA  |
| RPS29       | 0.865  | 0.76 - 0.99 | 0.036   | 0.054        | 0.843  | 0.71 - 1.01 | 0.060   | 0.081        | RPS29 | ---    | ---         | ---     | --- | ---    | ---         | ---     | --- |
| EIF3H       | 0.93   | 0.81 - 1.06 | 0.282   | 0.322        | 0.856  | 0.72 - 1.02 | 0.081   | 0.081        | EIF3H | 1.057  | 0.91 - 1.24 | 0.48    | NA  | 1.191  | 1.02 - 1.39 | 0.028   | NA  |
| EIF3M       | 0.936  | 0.82 - 1.07 | 0.322   | 0.322        | 0.851  | 0.71 - 1.02 | 0.079   | 0.081        | EIF3M | 1.112  | 0.96 - 1.28 | 0.146   | NA  | 1.150  | 0.99 - 1.33 | 0.062   | NA  |
| RPS7        | 0.849  | 0.74 - 0.97 | 0.02    | <b>0.04</b>  | 0.813  | 0.68 - 0.98 | 0.027   | 0.081        | RPS7  | 1.032  | 0.89 - 1.20 | 0.672   | NA  | 0.981  | 0.84 - 1.15 | 0.809   | NA  |

**B**  
Bortezomib PFS

| HOVON65     | Low expression |             |         |              | High expression |             |         |     | APEX        | Low expression |             |         |              | High expression |             |         |     |
|-------------|----------------|-------------|---------|--------------|-----------------|-------------|---------|-----|-------------|----------------|-------------|---------|--------------|-----------------|-------------|---------|-----|
|             | exp(B)         | 95% CI      | p-value | FDR          | exp(B)          | 95% CI      | p-value | FDR |             | exp(B)         | 95% CI      | p-value | FDR          | exp(B)          | 95% CI      | p-value | FDR |
| RPS21       | 0.60           | 0.39 - 0.93 | 0.02    | <b>0.04</b>  | 1.00            | 0.60 - 1.53 | 0.9     | NA  | RPS21       | 0.63           | 0.40 - 0.99 | 0.05    | 0.07         | 0.91            | 0.57 - 1.44 | 0.7     | NA  |
| <b>RPL5</b> | 0.67           | 0.47 - 0.96 | 0.03    | <b>0.045</b> | 1.00            | 0.69 - 1.41 | 0.9     | NA  | <b>RPL5</b> | 0.58           | 0.38 - 0.91 | 0.02    | <b>0.03</b>  | 0.93            | 0.58 - 1.49 | 0.8     | NA  |
| RPS29       | 0.75           | 0.53 - 1.07 | 0.12    | 0.12         | 0.93            | 0.64 - 1.34 | 0.7     | NA  | RPS29       | 0.56           | 0.36 - 0.87 | 0.01    | <b>0.03</b>  | 0.96            | 0.60 - 1.53 | 0.9     | NA  |
| EIF3H       | 0.72           | 0.50 - 1.03 | 0.07    | 0.08         | 0.93            | 0.65 - 1.33 | 0.7     | NA  | EIF3H       | 0.79           | 0.51 - 1.23 | 0.3     | 0.3          | 0.71            | 0.45 - 1.13 | 0.2     | NA  |
| EIF3M       | 0.65           | 0.45 - 0.93 | 0.02    | <b>0.04</b>  | 0.98            | 0.68 - 1.40 | 0.9     | NA  | EIF3M       | 0.69           | 0.44 - 1.07 | 0.1     | 0.12         | 0.81            | 0.51 - 1.28 | 0.4     | NA  |
| <b>RPS7</b> | 0.67           | 0.47 - 0.95 | 0.02    | <b>0.04</b>  | 1.00            | 0.72 - 1.51 | 0.8     | NA  | <b>RPS7</b> | 0.43           | 0.27 - 0.68 | 0.0003  | <b>0.002</b> | 1.11            | 0.70 - 1.75 | 0.7     | NA  |

**C**

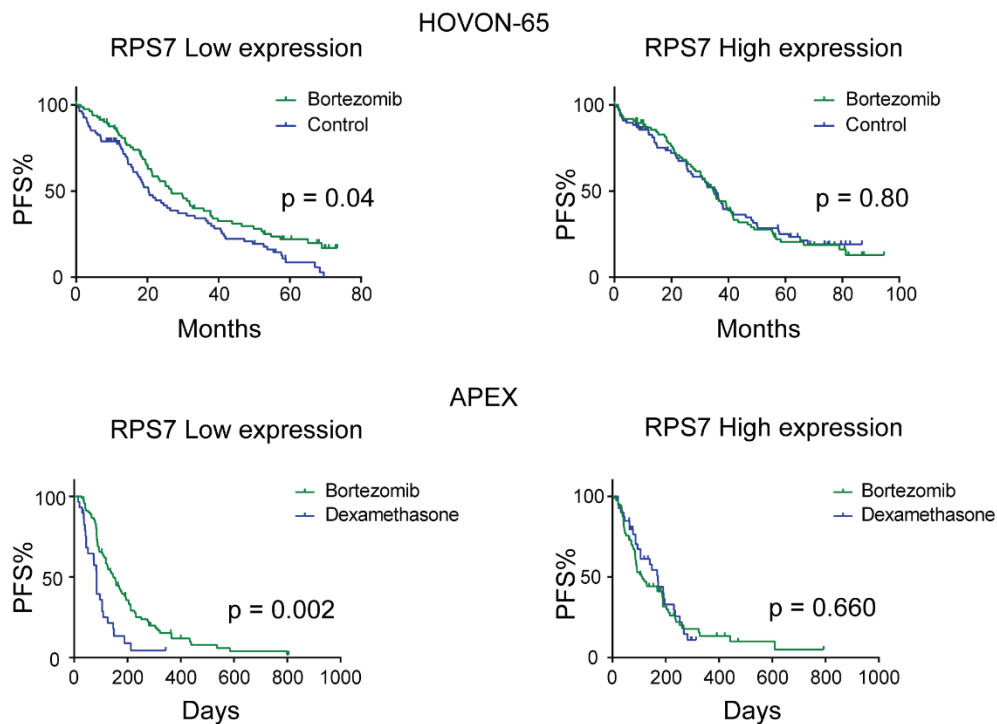

**Supplementary Figure 6. The ribosome and other translational components are downregulated in patients responding to bortezomib.**

(A) COX regression analysis on top ribosome/translation genes in the GSEA list of differentially expressed genes between bortezomib responders and non-responders revealed that only *RPL5* expression is correlated with significantly different PFS and OS in the HOVON-65 trial. No significant differences on survival are found in the APEX trial. The proportional hazard assumption was assessed by computing the time dependent covariate in SPSS. In the analyses marked with an asterisk, the proportional hazard assumption was not met, and therefore the results of the Cox model are not given. (B) COX regression analysis showing that *RPS7* was the only other ribosome/ translation gene besides *RPL5* for which low expression correlated with bortezomib benefit on PFS in both the HOVON-65 and APEX trial. The proportional hazard assumption was met for all analyses. (C) Kaplan-Meier curves for PFS of patients with low or high expression of *RPS7* showing that, similar as for *RPL5*, patients with low expression do better on bortezomib treatment while patients with high expression fail to benefit from the treatment. Low and high expression are defined here as below and above median.

A

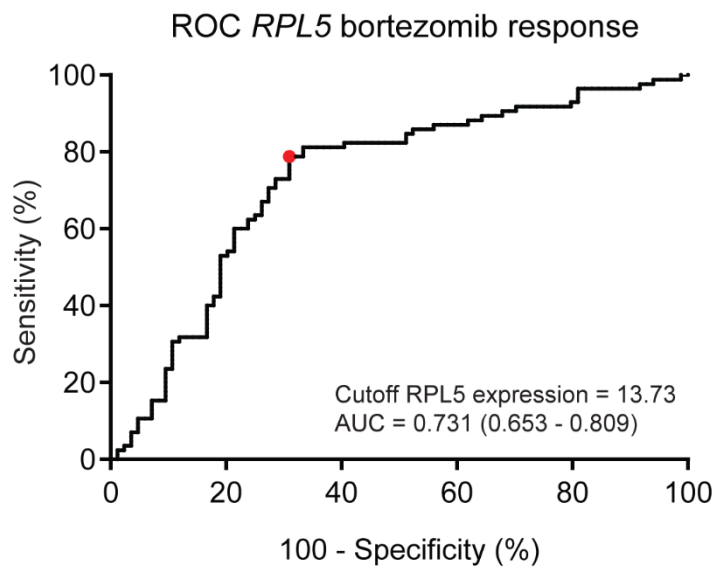

B

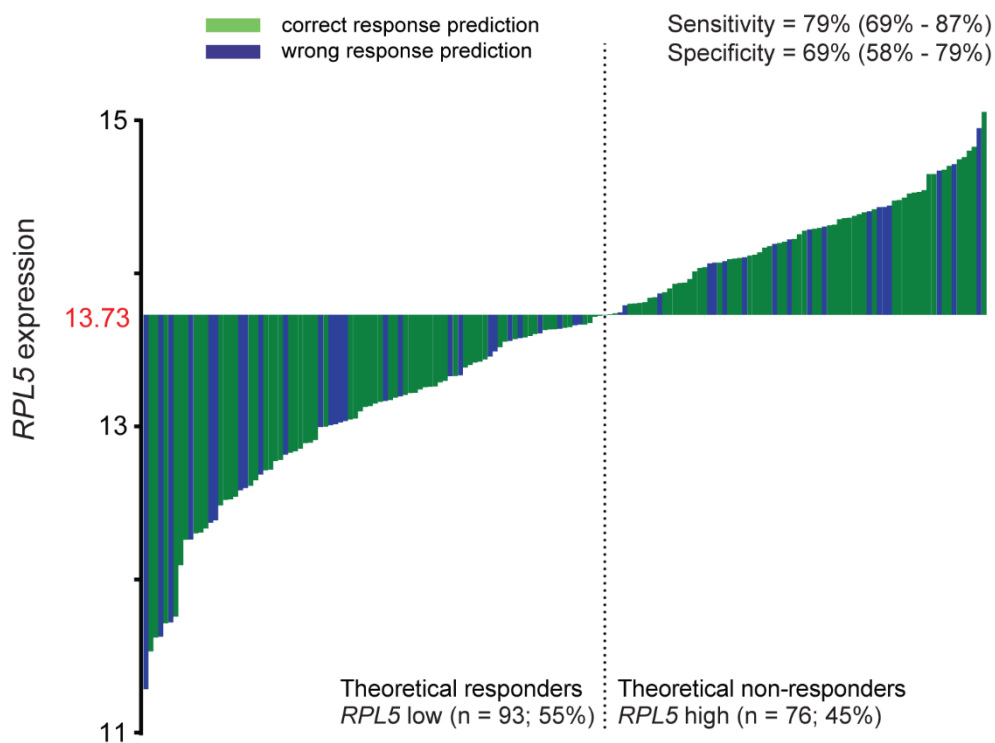

**Supplementary figure 7. Optimal cutoff analysis to determine best threshold of *RPL5* expression to predict response to bortezomib treatment.**

(A) ROC analysis determines the optimal cutoff for *RPL5* expression to predict bortezomib response at 13.73 in the APEX trial. (B) Waterfall plot showing prediction of bortezomib response applying the cutoff value determined in (A). Using this threshold, bortezomib response in the APEX cohort was predicted with a sensitivity of 79% and a specificity of 69%

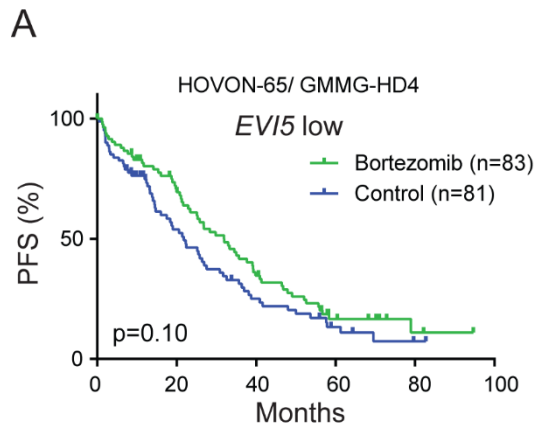

|            | Median PFS (Months) |
|------------|---------------------|
| Bortezomib | 32                  |
| Control    | 22                  |

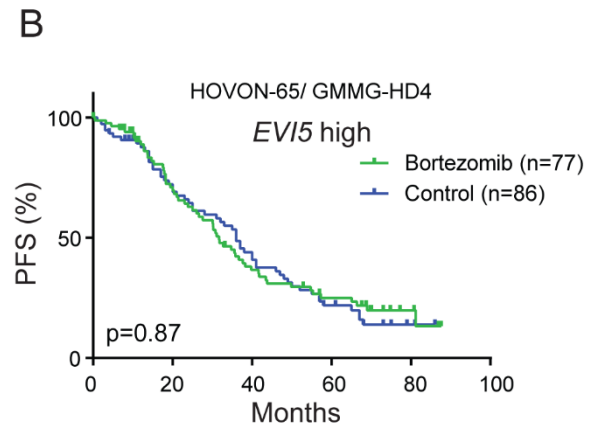

|            | Median PFS (Months) |
|------------|---------------------|
| Bortezomib | 32                  |
| Control    | 36                  |

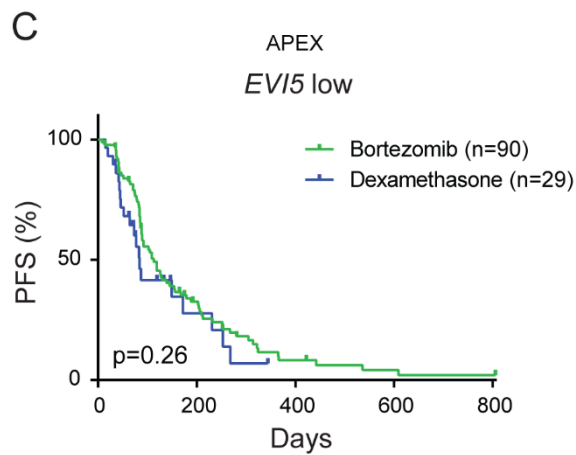

|               | Median PFS (Days) |
|---------------|-------------------|
| Bortezomib    | 113               |
| Dexamethasone | 84                |

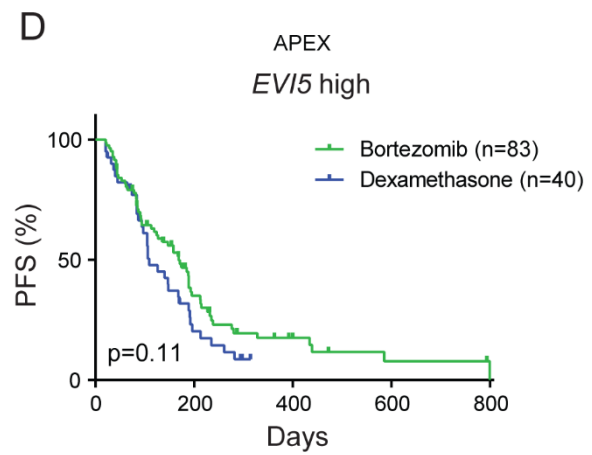

|               | Median PFS (Days) |
|---------------|-------------------|
| Bortezomib    | 169               |
| Dexamethasone | 109               |

**Supplementary Figure 8. *EVI5* expression is not significantly linked to the benefit of bortezomib on PFS**

(A-B) Kaplan-Meier curves comparing PFS of *EVI5* low (A) and high (B) expressing patients for bortezomib versus non-bortezomib arms in the HOVON-65/ GMMG-HD4 trial. (C-D) Kaplan-Meier curves comparing PFS of *EVI5* low (C) and high (D) expressing patients for bortezomib versus dexamethasone arms in the APEX trial. Low and high expression are defined here as below and above median. All p-values were calculated with Log-rank tests.

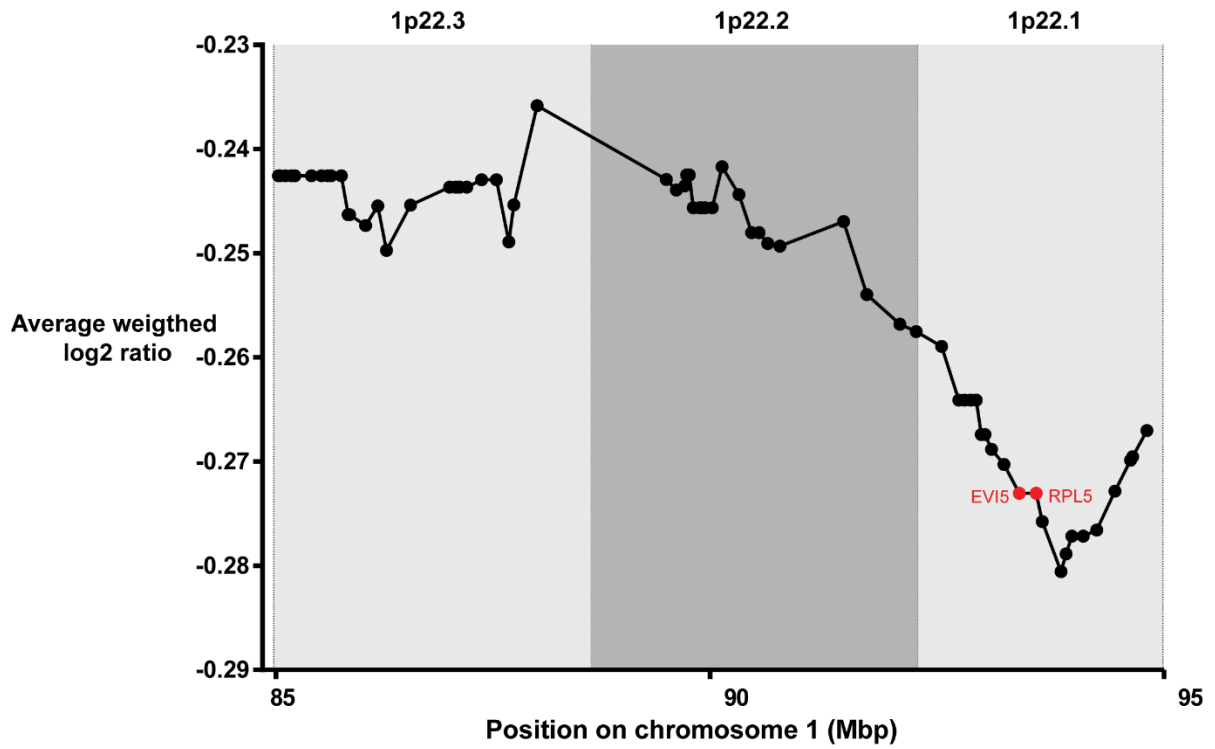

**Supplementary Figure 9. Average weighted log2 array ratio of 1p22 genes in MMRC cohort.**

Each dot represents a gene on 1p22. Chromosomal location is indicated on the x-axis while the y-axis shows the average weighted log2 ratio, calculated as the average of all weighted log2 ratios of all patients in the public MMRC cohort.

## **Supplementary Tables**

**Supplementary table 1. Genetic characteristics of the UZ Leuven patient cohort**

**Supplementary table 2. 1p22 deletions in UZ Leuven cohort**

**Supplementary table 3. Calculation of average weighted log2 ratio of 1p22 genes in UZ Leuven cohort**

**Supplementary table 4. Calculation of mutation score of 1p22.1 genes in MMRC cohort**

**Supplementary table 5. Calculation of TRansFIC functional impact score of 1p22.1 mutated genes in MMRC cohort**

**Supplementary table 6. Probes differentially expressed between bortezomib responders and non-responders in the bortezomib arm of the APEX clinical trial**

**Supplementary table 7. KEGG gene sets significantly downregulated in bortezomib responders versus non-responders.**

**Supplementary table 8. Positional gene sets significantly downregulated in bortezomib responders versus non-responders.**

**Supplementary table 1. Genetic characteristics of the UZ Leuven patient cohort**

| Case | Relevant chromosomal aberrations found by FISH                    | 1p22 loss by aCGH | 1p22 loss by FISH |
|------|-------------------------------------------------------------------|-------------------|-------------------|
| MM01 | t(11;14)/IGH-CCND1; del(17p13)/TP53                               | yes               | yes               |
| MM02 | del(14q); del(13q14)/RB1                                          | yes               | yes               |
| MM03 | t(11;14)/IGH-CCND1                                                | no                | ND                |
| MM05 | t(11;14)/IGH-CCND1; del(13q14)/RB1; del(17p13)/TP53               | yes               | yes               |
| MM07 | gain 1q21; del(13q14)/RB1; HD                                     | yes               | yes               |
| MM08 | del(13q14)/RB1; del(17p13)/TP53; HD                               | no                | ND                |
| MM09 | t(11;14)/IGH-CCND1                                                | no                | ND                |
| MM10 | t(11;14)/IGH-CCND1                                                | no                | ND                |
| MM11 | HD                                                                | no                | ND                |
| MM12 | del(13q14)/RB1; HD                                                | yes               | yes               |
| MM13 | t(11;14)/IGH-CCND1                                                | no                | ND                |
| MM14 | del(13q14)/RB1; HD                                                | no                | ND                |
| MM15 | gain 1q21; non IGH-t(8q24/MYC)                                    | yes               | ND                |
| MM16 | del(13q14)/RB1; t(14;20)/IGH-MAFB; del(17p13)/TP53                | yes               | yes               |
| MM17 | HD                                                                | no                | ND                |
| MM18 | t(6;14)/IGH-CCND3                                                 | no                | ND                |
| MM19 | HD                                                                | no                | ND                |
| MM20 | t(11;14)/IGH-CCND1                                                | no                | ND                |
| MM21 | non IGH-t(8q24/MYC); del(13q14)/RB1; del(17p13)/TP53              | yes               | yes               |
| MM22 | unknown t(14q32/IGH)                                              | no                | ND                |
| MM23 | gain 1q21; del(13q14)/RB1; t(14;16)/IGH-CMAF                      | yes               | yes               |
| MM24 | HD                                                                | no                | ND                |
| MM26 | gain 1q21; del(13q14)/RB1; t(14;16)/IGH-CMAF                      | yes               | yes               |
| MM27 | del(13q14)/RB1; HD                                                | yes               | yes               |
| MM28 | HD                                                                | yes               | ND                |
| MM29 | gain 1q21; t(4;14)/IGH-FGFR3; non IGH-t(8q24/MYC); del(13q14)/RB1 | no                | ND                |
| MM30 | del(13q14)/RB1; HD                                                | no                | ND                |
| MM31 | non IGH-t(8q24/MYC); t(11;14)/IGH-CCND1                           | no                | ND                |
| MM32 | t(11;14)/IGH-CCND1                                                | no                | ND                |
| MM33 | HD                                                                | no                | ND                |
| MM34 | HD                                                                | yes               | ND                |
| MM35 | HD                                                                | no                | ND                |
| MM36 | del(13q14)/RB1; HD                                                | yes               | yes               |
| MM37 | non IGH-t(8q24/MYC); HD                                           | yes               | ND                |
| MM38 | gain 1q21; t(11;14)/IGH-CCND1; del(13q14)/RB1                     | no                | ND                |

abbreviations: FISH, fluorescence in situ hybridization; HD, hyperdiploidy; ND, not determined

**Supplementary table 2. 1p22 deletions in UZ Leuven cohort**

| <b>Patient</b> | <b>Chr</b> | <b>Start (bp) hg19</b> | <b>End (bp) hg19</b> | <b>Size (bp)</b> | <b>Weighted log2 ratio</b> |
|----------------|------------|------------------------|----------------------|------------------|----------------------------|
| MM01           | 1          | 91237660               | 98040690             | 6803030          | -0.50                      |
| MM02           | 1          | 92937414               | 93303113             | 365699           | -0.30                      |
| MM05           | 1          | 93245520               | 93549070             | 303550           | -0.60                      |
| MM07           | 1          | 90061250               | 93531180             | 3469930          | -0.40                      |
| MM12           | 1          | 50098180               | 108935200            | 58837020         | -0.25                      |
| MM15           | 1          | 46964300               | 103142700            | 56178400         | -0.15                      |
| MM16           | 1          | 80333100               | 119260200            | 38927100         | -0.25                      |
| MM21           | 1          | 89212340               | 93651540             | 4439200          | -0.15                      |
| MM23           | 1          | 84348430               | 118610600            | 34262170         | -0.40                      |
| MM26           | 1          | 88055730               | 118207300            | 30151570         | -0.25                      |
| MM27           | 1          | 92705820               | 99739050             | 7033230          | -0.15                      |
| MM28           | 1          | 36670000               | 120523042            | 83853042         | -0.20                      |
| MM34           | 1          | 68577240               | 157447200            | 88869960         | -0.20                      |
| MM36           | 1          | 88411940               | 99879270             | 11467330         | -0.30                      |
| MM37           | 1          | 0                      | 249250600            | 249250600        | -0.15                      |

**Supplementary table 3. Calculation of average weighted log2 ratio of 1p22 genes in UZ Leuven cohort**

| Gene Name           | Ensembl Gene ID | Location | Weighted log2 array value |      |      |      |      |      |      |      |      |       |      |      |       |       |      |      |      |      |       |      |      |      |       |      |      |      |      |      |      |      |      |      | Average weighted log2 value |       |      |               |
|---------------------|-----------------|----------|---------------------------|------|------|------|------|------|------|------|------|-------|------|------|-------|-------|------|------|------|------|-------|------|------|------|-------|------|------|------|------|------|------|------|------|------|-----------------------------|-------|------|---------------|
|                     |                 |          | MM01                      | MM02 | MM03 | MM05 | MM07 | MM08 | MM09 | MM10 | MM11 | MM12  | MM13 | MM14 | MM15  | MM16  | MM17 | MM18 | MM19 | MM20 | MM21  | MM22 | MM23 | MM24 | MM26  | MM27 | MM28 | MM29 | MM30 | MM31 | MM32 | MM33 | MM34 | MM35 |                             | MM36  | MM37 | MM38          |
| <i>RPF1</i>         | ENSG00000117133 | 1p22.3   | 0                         | 0    | 0    | 0    | 0    | 0    | 0    | 0    | 0    | -0.25 | 0    | 0    | -0.15 | -0.25 | 0    | 0    | 0    | 0    | 0     | 0    | -0.4 | 0    | 0     | 0    | -0.2 | 0    | 0    | 0    | 0    | 0    | -0.2 | 0    | 0                           | -0.15 | 0    | <b>-0.044</b> |
| <i>GNG5</i>         | ENSG00000174021 | 1p22.3   | 0                         | 0    | 0    | 0    | 0    | 0    | 0    | 0    | 0    | -0.25 | 0    | 0    | -0.15 | -0.25 | 0    | 0    | 0    | 0    | 0     | 0    | -0.4 | 0    | 0     | 0    | -0.2 | 0    | 0    | 0    | 0    | 0    | -0.2 | 0    | 0                           | -0.15 | 0    | <b>-0.044</b> |
| <i>CTBS</i>         | ENSG00000117151 | 1p22.3   | 0                         | 0    | 0    | 0    | 0    | 0    | 0    | 0    | 0    | -0.25 | 0    | 0    | -0.15 | -0.25 | 0    | 0    | 0    | 0    | 0     | 0    | -0.4 | 0    | 0     | 0    | -0.2 | 0    | 0    | 0    | 0    | 0    | -0.2 | 0    | 0                           | -0.15 | 0    | <b>-0.044</b> |
| <i>C1orf180</i>     | ENSG00000180869 | 1p22.3   | 0                         | 0    | 0    | 0    | 0    | 0    | 0    | 0    | 0    | -0.25 | 0    | 0    | -0.15 | -0.25 | 0    | 0    | 0    | 0    | 0     | 0    | -0.4 | 0    | 0     | 0    | -0.2 | 0    | 0    | 0    | 0    | 0    | -0.2 | 0    | 0                           | -0.15 | 0    | <b>-0.044</b> |
| <i>SSX2IP</i>       | ENSG00000117155 | 1p22.3   | 0                         | 0    | 0    | 0    | 0    | 0    | 0    | 0    | 0    | -0.25 | 0    | 0    | -0.15 | -0.25 | 0    | 0    | 0    | 0    | 0     | 0    | -0.4 | 0    | 0     | 0    | -0.2 | 0    | 0    | 0    | 0    | 0    | -0.2 | 0    | 0                           | -0.15 | 0    | <b>-0.044</b> |
| <i>LPAR3</i>        | ENSG00000171517 | 1p22.3   | 0                         | 0    | 0    | 0    | 0    | 0    | 0    | 0    | 0    | -0.25 | 0    | 0    | -0.15 | -0.25 | 0    | 0    | 0    | 0    | 0     | 0    | -0.4 | 0    | 0     | 0    | -0.2 | 0    | 0    | 0    | 0    | 0    | -0.2 | 0    | 0                           | -0.15 | 0    | <b>-0.044</b> |
| <i>MCOLN2</i>       | ENSG00000153898 | 1p22.3   | 0                         | 0    | 0    | 0    | 0    | 0    | 0    | 0    | 0    | -0.25 | 0    | 0    | -0.15 | -0.25 | 0    | 0    | 0    | 0    | 0     | 0    | -0.4 | 0    | 0     | 0    | -0.2 | 0    | 0    | 0    | 0    | 0    | -0.2 | 0    | 0                           | -0.15 | 0    | <b>-0.044</b> |
| <i>WDR63</i>        | ENSG00000162643 | 1p22.3   | 0                         | 0    | 0    | 0    | 0    | 0    | 0    | 0    | 0    | -0.25 | 0    | 0    | -0.15 | -0.25 | 0    | 0    | 0    | 0    | 0     | 0    | -0.4 | 0    | 0     | 0    | -0.2 | 0    | 0    | 0    | 0    | 0    | -0.2 | 0    | 0                           | -0.15 | 0    | <b>-0.044</b> |
| <i>MCOLN3</i>       | ENSG00000055732 | 1p22.3   | 0                         | 0    | 0    | 0    | 0    | 0    | 0    | 0    | 0    | -0.25 | 0    | 0    | -0.15 | -0.25 | 0    | 0    | 0    | 0    | 0     | 0    | -0.4 | 0    | 0     | 0    | -0.2 | 0    | 0    | 0    | 0    | 0    | -0.2 | 0    | 0                           | -0.15 | 0    | <b>-0.044</b> |
| <i>SYDE2</i>        | ENSG00000097096 | 1p22.3   | 0                         | 0    | 0    | 0    | 0    | 0    | 0    | 0    | 0    | -0.25 | 0    | 0    | -0.15 | -0.25 | 0    | 0    | 0    | 0    | 0     | 0    | -0.4 | 0    | 0     | 0    | -0.2 | 0    | 0    | 0    | 0    | 0    | -0.2 | 0    | 0                           | -0.15 | 0    | <b>-0.044</b> |
| <i>C1orf52</i>      | ENSG00000162642 | 1p22.3   | 0                         | 0    | 0    | 0    | 0    | 0    | 0    | 0    | 0    | -0.25 | 0    | 0    | -0.15 | -0.25 | 0    | 0    | 0    | 0    | 0     | 0    | -0.4 | 0    | 0     | 0    | -0.2 | 0    | 0    | 0    | 0    | 0    | -0.2 | 0    | 0                           | -0.15 | 0    | <b>-0.044</b> |
| <i>BCL10</i>        | ENSG00000142867 | 1p22.3   | 0                         | 0    | 0    | 0    | 0    | 0    | 0    | 0    | 0    | -0.25 | 0    | 0    | -0.15 | -0.25 | 0    | 0    | 0    | 0    | 0     | 0    | -0.4 | 0    | 0     | 0    | -0.2 | 0    | 0    | 0    | 0    | 0    | -0.2 | 0    | 0                           | -0.15 | 0    | <b>-0.044</b> |
| <i>DDAH1</i>        | ENSG00000153904 | 1p22.3   | 0                         | 0    | 0    | 0    | 0    | 0    | 0    | 0    | 0    | -0.25 | 0    | 0    | -0.15 | -0.25 | 0    | 0    | 0    | 0    | 0     | 0    | -0.4 | 0    | 0     | 0    | -0.2 | 0    | 0    | 0    | 0    | 0    | -0.2 | 0    | 0                           | -0.15 | 0    | <b>-0.044</b> |
| <i>CYR61</i>        | ENSG00000142871 | 1p22.3   | 0                         | 0    | 0    | 0    | 0    | 0    | 0    | 0    | 0    | -0.25 | 0    | 0    | -0.15 | -0.25 | 0    | 0    | 0    | 0    | 0     | 0    | -0.4 | 0    | 0     | 0    | -0.2 | 0    | 0    | 0    | 0    | 0    | -0.2 | 0    | 0                           | -0.15 | 0    | <b>-0.044</b> |
| <i>ZNHIT6</i>       | ENSG00000117174 | 1p22.3   | 0                         | 0    | 0    | 0    | 0    | 0    | 0    | 0    | 0    | -0.25 | 0    | 0    | -0.15 | -0.25 | 0    | 0    | 0    | 0    | 0     | 0    | -0.4 | 0    | 0     | 0    | -0.2 | 0    | 0    | 0    | 0    | 0    | -0.2 | 0    | 0                           | -0.15 | 0    | <b>-0.044</b> |
| <i>COL24A1</i>      | ENSG00000171502 | 1p22.3   | 0                         | 0    | 0    | 0    | 0    | 0    | 0    | 0    | 0    | -0.25 | 0    | 0    | -0.15 | -0.25 | 0    | 0    | 0    | 0    | 0     | 0    | -0.4 | 0    | 0     | 0    | -0.2 | 0    | 0    | 0    | 0    | 0    | -0.2 | 0    | 0                           | -0.15 | 0    | <b>-0.044</b> |
| <i>ODF2L</i>        | ENSG00000122417 | 1p22.3   | 0                         | 0    | 0    | 0    | 0    | 0    | 0    | 0    | 0    | -0.25 | 0    | 0    | -0.15 | -0.25 | 0    | 0    | 0    | 0    | 0     | 0    | -0.4 | 0    | 0     | 0    | -0.2 | 0    | 0    | 0    | 0    | 0    | -0.2 | 0    | 0                           | -0.15 | 0    | <b>-0.044</b> |
| <i>CLCA2</i>        | ENSG00000137975 | 1p22.3   | 0                         | 0    | 0    | 0    | 0    | 0    | 0    | 0    | 0    | -0.25 | 0    | 0    | -0.15 | -0.25 | 0    | 0    | 0    | 0    | 0     | 0    | -0.4 | 0    | 0     | 0    | -0.2 | 0    | 0    | 0    | 0    | 0    | -0.2 | 0    | 0                           | -0.15 | 0    | <b>-0.044</b> |
| <i>CLCA1</i>        | ENSG00000016490 | 1p22.3   | 0                         | 0    | 0    | 0    | 0    | 0    | 0    | 0    | 0    | -0.25 | 0    | 0    | -0.15 | -0.25 | 0    | 0    | 0    | 0    | 0     | 0    | -0.4 | 0    | 0     | 0    | -0.2 | 0    | 0    | 0    | 0    | 0    | -0.2 | 0    | 0                           | -0.15 | 0    | <b>-0.044</b> |
| <i>CLCA4</i>        | ENSG00000016602 | 1p22.3   | 0                         | 0    | 0    | 0    | 0    | 0    | 0    | 0    | 0    | -0.25 | 0    | 0    | -0.15 | -0.25 | 0    | 0    | 0    | 0    | 0     | 0    | -0.4 | 0    | 0     | 0    | -0.2 | 0    | 0    | 0    | 0    | 0    | -0.2 | 0    | 0                           | -0.15 | 0    | <b>-0.044</b> |
| <i>SH3GLB1</i>      | ENSG00000097033 | 1p22.3   | 0                         | 0    | 0    | 0    | 0    | 0    | 0    | 0    | 0    | -0.25 | 0    | 0    | -0.15 | -0.25 | 0    | 0    | 0    | 0    | 0     | 0    | -0.4 | 0    | 0     | 0    | -0.2 | 0    | 0    | 0    | 0    | 0    | -0.2 | 0    | 0                           | -0.15 | 0    | <b>-0.044</b> |
| <i>RP4-604K5.1</i>  | ENSG00000183291 | 1p22.3   | 0                         | 0    | 0    | 0    | 0    | 0    | 0    | 0    | 0    | -0.25 | 0    | 0    | -0.15 | -0.25 | 0    | 0    | 0    | 0    | 0     | 0    | -0.4 | 0    | 0     | 0    | -0.2 | 0    | 0    | 0    | 0    | 0    | -0.2 | 0    | 0                           | -0.15 | 0    | <b>-0.044</b> |
| <i>HS2ST1</i>       | ENSG00000153936 | 1p22.3   | 0                         | 0    | 0    | 0    | 0    | 0    | 0    | 0    | 0    | -0.25 | 0    | 0    | -0.15 | -0.25 | 0    | 0    | 0    | 0    | 0     | 0    | -0.4 | 0    | 0     | 0    | -0.2 | 0    | 0    | 0    | 0    | 0    | -0.2 | 0    | 0                           | -0.15 | 0    | <b>-0.044</b> |
| <i>RP5-105I5.2</i>  | ENSG00000267561 | 1p22.3   | 0                         | 0    | 0    | 0    | 0    | 0    | 0    | 0    | 0    | -0.25 | 0    | 0    | -0.15 | -0.25 | 0    | 0    | 0    | 0    | 0     | 0    | -0.4 | 0    | 0     | 0    | -0.2 | 0    | 0    | 0    | 0    | 0    | -0.2 | 0    | 0                           | -0.15 | 0    | <b>-0.044</b> |
| <i>LMO4</i>         | ENSG00000143013 | 1p22.3   | 0                         | 0    | 0    | 0    | 0    | 0    | 0    | 0    | 0    | -0.25 | 0    | 0    | -0.15 | -0.25 | 0    | 0    | 0    | 0    | 0     | 0    | -0.4 | 0    | 0     | 0    | -0.2 | 0    | 0    | 0    | 0    | 0    | -0.2 | 0    | 0                           | -0.15 | 0    | <b>-0.044</b> |
| <i>PKN2</i>         | ENSG00000065243 | 1p22.2   | 0                         | 0    | 0    | 0    | 0    | 0    | 0    | 0    | 0    | -0.25 | 0    | 0    | -0.15 | -0.25 | 0    | 0    | 0    | 0    | 0     | 0    | -0.4 | 0    | -0.25 | 0    | -0.2 | 0    | 0    | 0    | 0    | 0    | -0.2 | 0    | -0.3                        | -0.15 | 0    | <b>-0.060</b> |
| <i>GTF2B</i>        | ENSG00000137947 | 1p22.2   | 0                         | 0    | 0    | 0    | 0    | 0    | 0    | 0    | 0    | -0.25 | 0    | 0    | -0.15 | -0.25 | 0    | 0    | 0    | 0    | -0.15 | 0    | -0.4 | 0    | -0.25 | 0    | -0.2 | 0    | 0    | 0    | 0    | 0    | -0.2 | 0    | -0.3                        | -0.15 | 0    | <b>-0.064</b> |
| <i>CCBL2</i>        | ENSG00000137944 | 1p22.2   | 0                         | 0    | 0    | 0    | 0    | 0    | 0    | 0    | 0    | -0.25 | 0    | 0    | -0.15 | -0.25 | 0    | 0    | 0    | 0    | -0.15 | 0    | -0.4 | 0    | -0.25 | 0    | -0.2 | 0    | 0    | 0    | 0    | 0    | -0.2 | 0    | -0.3                        | -0.15 | 0    | <b>-0.064</b> |
| <i>RBMXL1</i>       | ENSG00000213516 | 1p22.2   | 0                         | 0    | 0    | 0    | 0    | 0    | 0    | 0    | 0    | -0.25 | 0    | 0    | -0.15 | -0.25 | 0    | 0    | 0    | 0    | -0.15 | 0    | -0.4 | 0    | -0.25 | 0    | -0.2 | 0    | 0    | 0    | 0    | 0    | -0.2 | 0    | -0.3                        | -0.15 | 0    | <b>-0.064</b> |
| <i>GBP3</i>         | ENSG00000117226 | 1p22.2   | 0                         | 0    | 0    | 0    | 0    | 0    | 0    | 0    | 0    | -0.25 | 0    | 0    | -0.15 | -0.25 | 0    | 0    | 0    | 0    | -0.15 | 0    | -0.4 | 0    | -0.25 | 0    | -0.2 | 0    | 0    | 0    | 0    | 0    | -0.2 | 0    | -0.3                        | -0.15 | 0    | <b>-0.064</b> |
| <i>GBP1</i>         | ENSG00000117228 | 1p22.2   | 0                         | 0    | 0    | 0    | 0    | 0    | 0    | 0    | 0    | -0.25 | 0    | 0    | -0.15 | -0.25 | 0    | 0    | 0    | 0    | -0.15 | 0    | -0.4 | 0    | -0.25 | 0    | -0.2 | 0    | 0    | 0    | 0    | 0    | -0.2 | 0    | -0.3                        | -0.15 | 0    | <b>-0.064</b> |
| <i>GBP2</i>         | ENSG00000162645 | 1p22.2   | 0                         | 0    | 0    | 0    | 0    | 0    | 0    | 0    | 0    | -0.25 | 0    | 0    | -0.15 | -0.25 | 0    | 0    | 0    | 0    | -0.15 | 0    | -0.4 | 0    | -0.25 | 0    | -0.2 | 0    | 0    | 0    | 0    | 0    | -0.2 | 0    | -0.3                        | -0.15 | 0    | <b>-0.064</b> |
| <i>GBP7</i>         | ENSG00000213512 | 1p22.2   | 0                         | 0    | 0    | 0    | 0    | 0    | 0    | 0    | 0    | -0.25 | 0    | 0    | -0.15 | -0.25 | 0    | 0    | 0    | 0    | -0.15 | 0    | -0.4 | 0    | -0.25 | 0    | -0.2 | 0    | 0    | 0    | 0    | 0    | -0.2 | 0    | -0.3                        | -0.15 | 0    | <b>-0.064</b> |
| <i>GBP4</i>         | ENSG00000162654 | 1p22.2   | 0                         | 0    | 0    | 0    | 0    | 0    | 0    | 0    | 0    | -0.25 | 0    | 0    | -0.15 | -0.25 | 0    | 0    | 0    | 0    | -0.15 | 0    | -0.4 | 0    | -0.25 | 0    | -0.2 | 0    | 0    | 0    | 0    | 0    | -0.2 | 0    | -0.3                        | -0.15 | 0    | <b>-0.064</b> |
| <i>GBP5</i>         | ENSG00000154451 | 1p22.2   | 0                         | 0    | 0    | 0    | 0    | 0    | 0    | 0    | 0    | -0.25 | 0    | 0    | -0.15 | -0.25 | 0    | 0    | 0    | 0    | -0.15 | 0    | -0.4 | 0    | -0.25 | 0    | -0.2 | 0    | 0    | 0    | 0    | 0    | -0.2 | 0    | -0.3                        | -0.15 | 0    | <b>-0.064</b> |
| <i>GBP6</i>         | ENSG00000183347 | 1p22.2   | 0                         | 0    | 0    | 0    | 0    | 0    | 0    | 0    | 0    | -0.25 | 0    | 0    | -0.15 | -0.25 | 0    | 0    | 0    | 0    | -0.15 | 0    | -0.4 | 0    | -0.25 | 0    | -0.2 | 0    | 0    | 0    | 0    | 0    | -0.2 | 0    | -0.3                        | -0.15 | 0    | <b>-0.064</b> |
| <i>LRRC8B</i>       | ENSG00000197147 | 1p22.2   | 0                         | 0    | 0    | 0    | 0    | 0    | 0    | 0    | 0    | -0.25 | 0    | 0    | -0.15 | -0.25 | 0    | 0    | 0    | 0    | -0.15 | 0    | -0.4 | 0    | -0.25 | 0    | -0.2 | 0    | 0    | 0    | 0    | 0    | -0.2 | 0    | -0.3                        | -0.15 | 0    | <b>-0.064</b> |
| <i>LRRC8C</i>       | ENSG00000171488 | 1p22.2   | 0                         | 0    | 0    | 0    | -0.4 | 0    | 0    | 0    | 0    | -0.25 | 0    | 0    | -0.15 | -0.25 | 0    | 0    | 0    | 0    | -0.15 | 0    | -0.4 | 0    | -0.25 | 0    | -0.2 | 0    | 0    | 0    | 0    | 0    | -0.2 | 0    | -0.3                        | -0.15 | 0    | <b>-0.075</b> |
| <i>RP11-302M6.4</i> | ENSG00000271949 | 1p22.2   | 0                         | 0    | 0    | 0    | -0.4 | 0    | 0    | 0    | 0    | -0.25 | 0    | 0    | -0.15 | -0.25 | 0    | 0    | 0    | 0    | -0.15 | 0    | -0.4 | 0    | -0.25 | 0    | -0.2 | 0    | 0    | 0    | 0    | 0    | -0.2 | 0    | -0.3                        | -0.15 | 0    | <b>-0.075</b> |
| <i>LRRC8D</i>       | ENSG00000171492 | 1p22.2   | 0                         | 0    | 0    | 0    | -0.4 | 0    | 0    | 0    | 0    | -0.25 | 0    | 0    | -0.15 | -0.25 | 0    | 0    | 0    | 0    | -0.15 | 0    | -0.4 | 0    | -0.25 | 0    | -0.2 | 0    | 0    | 0    | 0    | 0    | -0.2 | 0    | -0.3                        | -0.15 | 0    | <b>-0.075</b> |
| <i>ZNF326</i>       | ENSG00000162664 | 1p22.2   | 0                         | 0    | 0    | 0    | -0.4 | 0    | 0    | 0    | 0    | -0.25 | 0    | 0    | -0.15 | -0.25 | 0    | 0    | 0    | 0    | -0.15 | 0    | -0.4 | 0    | -0.25 | 0    | -0.2 | 0    | 0    | 0    | 0    | 0    |      |      |                             |       |      |               |



|          |                 |        |      |      |   |      |      |   |   |   |   |       |   |   |       |       |   |   |   |   |       |   |      |   |       |       |      |   |   |   |   |   |   |      |   |      |       |   |        |
|----------|-----------------|--------|------|------|---|------|------|---|---|---|---|-------|---|---|-------|-------|---|---|---|---|-------|---|------|---|-------|-------|------|---|---|---|---|---|---|------|---|------|-------|---|--------|
| CDC7     | ENSG00000097046 | 1p22.2 | -0.5 | 0    | 0 | 0    | -0.4 | 0 | 0 | 0 | 0 | -0.25 | 0 | 0 | -0.15 | -0.25 | 0 | 0 | 0 | 0 | -0.15 | 0 | -0.4 | 0 | -0.25 | 0     | -0.2 | 0 | 0 | 0 | 0 | 0 | 0 | -0.2 | 0 | -0.3 | -0.15 | 0 | -0.089 |
| TGFBR3   | ENSG00000069702 | 1p22.1 | -0.5 | 0    | 0 | 0    | -0.4 | 0 | 0 | 0 | 0 | -0.25 | 0 | 0 | -0.15 | -0.25 | 0 | 0 | 0 | 0 | -0.15 | 0 | -0.4 | 0 | -0.25 | 0     | -0.2 | 0 | 0 | 0 | 0 | 0 | 0 | -0.2 | 0 | -0.3 | -0.15 | 0 | -0.089 |
| BRDT     | ENSG00000137948 | 1p22.1 | -0.5 | 0    | 0 | 0    | -0.4 | 0 | 0 | 0 | 0 | -0.25 | 0 | 0 | -0.15 | -0.25 | 0 | 0 | 0 | 0 | -0.15 | 0 | -0.4 | 0 | -0.25 | 0     | -0.2 | 0 | 0 | 0 | 0 | 0 | 0 | -0.2 | 0 | -0.3 | -0.15 | 0 | -0.089 |
| EPHX4    | ENSG00000172031 | 1p22.1 | -0.5 | 0    | 0 | 0    | -0.4 | 0 | 0 | 0 | 0 | -0.25 | 0 | 0 | -0.15 | -0.25 | 0 | 0 | 0 | 0 | -0.15 | 0 | -0.4 | 0 | -0.25 | 0     | -0.2 | 0 | 0 | 0 | 0 | 0 | 0 | -0.2 | 0 | -0.3 | -0.15 | 0 | -0.089 |
| BTBD8    | ENSG00000189195 | 1p22.1 | -0.5 | 0    | 0 | 0    | -0.4 | 0 | 0 | 0 | 0 | -0.25 | 0 | 0 | -0.15 | -0.25 | 0 | 0 | 0 | 0 | -0.15 | 0 | -0.4 | 0 | -0.25 | 0     | -0.2 | 0 | 0 | 0 | 0 | 0 | 0 | -0.2 | 0 | -0.3 | -0.15 | 0 | -0.089 |
| KIAA1107 | ENSG00000069712 | 1p22.1 | -0.5 | 0    | 0 | 0    | -0.4 | 0 | 0 | 0 | 0 | -0.25 | 0 | 0 | -0.15 | -0.25 | 0 | 0 | 0 | 0 | -0.15 | 0 | -0.4 | 0 | -0.25 | -0.15 | -0.2 | 0 | 0 | 0 | 0 | 0 | 0 | -0.2 | 0 | -0.3 | -0.15 | 0 | -0.093 |
| C1orf146 | ENSG00000203910 | 1p22.1 | -0.5 | 0    | 0 | 0    | -0.4 | 0 | 0 | 0 | 0 | -0.25 | 0 | 0 | -0.15 | -0.25 | 0 | 0 | 0 | 0 | -0.15 | 0 | -0.4 | 0 | -0.25 | -0.15 | -0.2 | 0 | 0 | 0 | 0 | 0 | 0 | -0.2 | 0 | -0.3 | -0.15 | 0 | -0.093 |
| GLMN     | ENSG00000174842 | 1p22.1 | -0.5 | 0    | 0 | 0    | -0.4 | 0 | 0 | 0 | 0 | -0.25 | 0 | 0 | -0.15 | -0.25 | 0 | 0 | 0 | 0 | -0.15 | 0 | -0.4 | 0 | -0.25 | -0.15 | -0.2 | 0 | 0 | 0 | 0 | 0 | 0 | -0.2 | 0 | -0.3 | -0.15 | 0 | -0.093 |
| RPAP2    | ENSG00000122484 | 1p22.1 | -0.5 | 0    | 0 | 0    | -0.4 | 0 | 0 | 0 | 0 | -0.25 | 0 | 0 | -0.15 | -0.25 | 0 | 0 | 0 | 0 | -0.15 | 0 | -0.4 | 0 | -0.25 | -0.15 | -0.2 | 0 | 0 | 0 | 0 | 0 | 0 | -0.2 | 0 | -0.3 | -0.15 | 0 | -0.093 |
| GFI1     | ENSG00000162676 | 1p22.1 | -0.5 | -0.3 | 0 | 0    | -0.4 | 0 | 0 | 0 | 0 | -0.25 | 0 | 0 | -0.15 | -0.25 | 0 | 0 | 0 | 0 | -0.15 | 0 | -0.4 | 0 | -0.25 | -0.15 | -0.2 | 0 | 0 | 0 | 0 | 0 | 0 | -0.2 | 0 | -0.3 | -0.15 | 0 | -0.101 |
| EVIS     | ENSG00000067208 | 1p22.1 | -0.5 | -0.3 | 0 | -0.6 | -0.4 | 0 | 0 | 0 | 0 | -0.25 | 0 | 0 | -0.15 | -0.25 | 0 | 0 | 0 | 0 | -0.15 | 0 | -0.4 | 0 | -0.25 | -0.15 | -0.2 | 0 | 0 | 0 | 0 | 0 | 0 | -0.2 | 0 | -0.3 | -0.15 | 0 | -0.118 |
| RPL5     | ENSG00000122406 | 1p22.1 | -0.5 | -0.3 | 0 | -0.6 | -0.4 | 0 | 0 | 0 | 0 | -0.25 | 0 | 0 | -0.15 | -0.25 | 0 | 0 | 0 | 0 | -0.15 | 0 | -0.4 | 0 | -0.25 | -0.15 | -0.2 | 0 | 0 | 0 | 0 | 0 | 0 | -0.2 | 0 | -0.3 | -0.15 | 0 | -0.118 |
| FAM69A   | ENSG00000154511 | 1p22.1 | -0.5 | 0    | 0 | -0.6 | -0.4 | 0 | 0 | 0 | 0 | -0.25 | 0 | 0 | -0.15 | -0.25 | 0 | 0 | 0 | 0 | -0.15 | 0 | -0.4 | 0 | -0.25 | -0.15 | -0.2 | 0 | 0 | 0 | 0 | 0 | 0 | -0.2 | 0 | -0.3 | -0.15 | 0 | -0.110 |
| MTF2     | ENSG00000143033 | 1p22.1 | -0.5 | 0    | 0 | -0.6 | 0    | 0 | 0 | 0 | 0 | -0.25 | 0 | 0 | -0.15 | -0.25 | 0 | 0 | 0 | 0 | -0.15 | 0 | -0.4 | 0 | -0.25 | -0.15 | -0.2 | 0 | 0 | 0 | 0 | 0 | 0 | -0.2 | 0 | -0.3 | -0.15 | 0 | -0.099 |
| TMED5    | ENSG00000117500 | 1p22.1 | -0.5 | 0    | 0 | 0    | 0    | 0 | 0 | 0 | 0 | -0.25 | 0 | 0 | -0.15 | -0.25 | 0 | 0 | 0 | 0 | -0.15 | 0 | -0.4 | 0 | -0.25 | -0.15 | -0.2 | 0 | 0 | 0 | 0 | 0 | 0 | -0.2 | 0 | -0.3 | -0.15 | 0 | -0.082 |
| CCDC18   | ENSG00000122483 | 1p22.1 | -0.5 | 0    | 0 | 0    | 0    | 0 | 0 | 0 | 0 | -0.25 | 0 | 0 | -0.15 | -0.25 | 0 | 0 | 0 | 0 | -0.15 | 0 | -0.4 | 0 | -0.25 | -0.15 | -0.2 | 0 | 0 | 0 | 0 | 0 | 0 | -0.2 | 0 | -0.3 | -0.15 | 0 | -0.082 |
| DR1      | ENSG00000117505 | 1p22.1 | -0.5 | 0    | 0 | 0    | 0    | 0 | 0 | 0 | 0 | -0.25 | 0 | 0 | -0.15 | -0.25 | 0 | 0 | 0 | 0 | -0.15 | 0 | -0.4 | 0 | -0.25 | -0.15 | -0.2 | 0 | 0 | 0 | 0 | 0 | 0 | -0.2 | 0 | -0.3 | -0.15 | 0 | -0.082 |
| FNBP1L   | ENSG00000137942 | 1p22.1 | -0.5 | 0    | 0 | 0    | 0    | 0 | 0 | 0 | 0 | -0.25 | 0 | 0 | -0.15 | -0.25 | 0 | 0 | 0 | 0 | -0.15 | 0 | -0.4 | 0 | -0.25 | -0.15 | -0.2 | 0 | 0 | 0 | 0 | 0 | 0 | -0.2 | 0 | -0.3 | -0.15 | 0 | -0.082 |
| BCAR3    | ENSG00000137936 | 1p22.1 | -0.5 | 0    | 0 | 0    | 0    | 0 | 0 | 0 | 0 | -0.25 | 0 | 0 | -0.15 | -0.25 | 0 | 0 | 0 | 0 | 0     | 0 | -0.4 | 0 | -0.25 | -0.15 | -0.2 | 0 | 0 | 0 | 0 | 0 | 0 | -0.2 | 0 | -0.3 | -0.15 | 0 | -0.078 |
| DNTTIP2  | ENSG00000067334 | 1p22.1 | -0.5 | 0    | 0 | 0    | 0    | 0 | 0 | 0 | 0 | -0.25 | 0 | 0 | -0.15 | -0.25 | 0 | 0 | 0 | 0 | 0     | 0 | -0.4 | 0 | -0.25 | -0.15 | -0.2 | 0 | 0 | 0 | 0 | 0 | 0 | -0.2 | 0 | -0.3 | -0.15 | 0 | -0.078 |
| GCLM     | ENSG00000023909 | 1p22.1 | -0.5 | 0    | 0 | 0    | 0    | 0 | 0 | 0 | 0 | -0.25 | 0 | 0 | -0.15 | -0.25 | 0 | 0 | 0 | 0 | 0     | 0 | -0.4 | 0 | -0.25 | -0.15 | -0.2 | 0 | 0 | 0 | 0 | 0 | 0 | -0.2 | 0 | -0.3 | -0.15 | 0 | -0.078 |
| ABCA4    | ENSG00000198691 | 1p22.1 | -0.5 | 0    | 0 | 0    | 0    | 0 | 0 | 0 | 0 | -0.25 | 0 | 0 | -0.15 | -0.25 | 0 | 0 | 0 | 0 | 0     | 0 | -0.4 | 0 | -0.25 | -0.15 | -0.2 | 0 | 0 | 0 | 0 | 0 | 0 | -0.2 | 0 | -0.3 | -0.15 | 0 | -0.078 |

Supplementary table 4. Calculation of mutation score of 1p22.1 genes in MMRC cohort

| Gene name       | # mutations in MMRC cohort | CDS length (bp) | mutation count / 1000 bp CDS | functional score (TRansFIC) | Total mutation score |
|-----------------|----------------------------|-----------------|------------------------------|-----------------------------|----------------------|
| <i>CDC7</i>     | 1                          | 1725            | 0.58                         | 0.38                        | <b>0.22</b>          |
| <i>TGFBR3</i>   | 1                          | 2556            | 0.39                         | 0.75                        | <b>0.29</b>          |
| <i>BRDT</i>     | 0                          | 2844            | 0.00                         | 0.00                        | <b>0.00</b>          |
| <i>EPHX4</i>    | 3                          | 1089            | 2.75                         | 0.25                        | <b>0.69</b>          |
| <i>BTBD8</i>    | 0                          | 1137            | 0.00                         | 0.00                        | <b>0.00</b>          |
| <i>KIAA1107</i> | 2                          | 4230            | 0.47                         | 0.75                        | <b>0.35</b>          |
| <i>C1orf146</i> | 0                          | 543             | 0.00                         | 0.00                        | <b>0.00</b>          |
| <i>GLMN</i>     | 1                          | 1785            | 0.56                         | 0.375                       | <b>0.21</b>          |
| <i>RPAP2</i>    | 0                          | 1839            | 0.00                         | 0.00                        | <b>0.00</b>          |
| <i>GFI1</i>     | 0                          | 1269            | 0.00                         | 0.00                        | <b>0.00</b>          |
| <i>EVI5</i>     | <b>2</b>                   | <b>2466</b>     | <b>0.81</b>                  | <b>0.92</b>                 | <b>0.74</b>          |
| <i>RPL5</i>     | <b>1</b>                   | <b>880</b>      | <b>1.14</b>                  | <b>0.75</b>                 | <b>0.85</b>          |
| <i>FAM69A</i>   | 0                          | 1287            | 0.00                         | 0.00                        | <b>0.00</b>          |
| <i>MTF2</i>     | 0                          | 1782            | 0.00                         | 0.00                        | <b>0.00</b>          |
| <i>TMED5</i>    | 0                          | 690             | 0.00                         | 0.00                        | <b>0.00</b>          |
| <i>CCDC18</i>   | 0                          | 4527            | 0.00                         | 0.00                        | <b>0.00</b>          |
| <i>DR1</i>      | 0                          | 531             | 0.00                         | 0.00                        | <b>0.00</b>          |
| <i>FNBP1L</i>   | 0                          | 1830            | 0.00                         | 0.00                        | <b>0.00</b>          |
| <i>BCAR3</i>    | 2                          | 2478            | 0.81                         | 0.25                        | <b>0.20</b>          |
| <i>DNTTIP2</i>  | 1                          | 2271            | 0.44                         | 0.31                        | <b>0.14</b>          |
| <i>GCLM</i>     | 0                          | 825             | 0.00                         | 0.00                        | <b>0.00</b>          |
| <i>ABCA4</i>    | 1                          | 6822            | 0.15                         | 0.38                        | <b>0.05</b>          |

Supplementary table 5. Calculation of TRansFIC functional impact score

| Gene            | Ensembl Transcript | Ensembl Protein | Location   | CDS position | protein position | AA change | siftTransfic impact | pph2TRansfic impact | Average TRansFIC score mutation | Average TRansFIC score gene |
|-----------------|--------------------|-----------------|------------|--------------|------------------|-----------|---------------------|---------------------|---------------------------------|-----------------------------|
| <i>TGFB3</i>    | ENST00000212355    | ENSP00000212355 | 1:92184913 | 1522         | 508              | R/W       | medium (0.50)       | high (1.00)         | 0.75                            | 0.75                        |
| <i>RPL5</i>     | ENST00000370321    | ENSP00000359345 | 1:93298955 | 13           | 5                | K/E       | high (1.00)         | medium (0.50)       | 0.75                            | 0.75                        |
| <i>KIAA1107</i> | ENST00000409154    | ENSP00000386957 | 1:92636956 | 425          | 142              | A/V       | medium (0.50)       | high (1.00)         | 0.75                            | 0.75                        |
| <i>KIAA1107</i> | ENST00000370378    | ENSP00000359404 | 1:92636956 | 260          | 87               | A/V       | high (1.00)         | medium (0.50)       | 0.75                            |                             |
| <i>KIAA1107</i> | ENST00000409154    | ENSP00000386957 | 1:92647504 | 3115         | 1039             | E/K       | high (1.00)         | medium (0.50)       | 0.75                            |                             |
| <i>KIAA1107</i> | ENST00000370378    | ENSP00000359404 | 1:92647504 | 2950         | 984              | E/K       | high (1.00)         | medium (0.50)       | 0.75                            |                             |
| <i>GLMN</i>     | ENST00000534881    | ENSP00000440156 | 1:92730179 | 1189         | 397              | S/G       | low (0.25)          | medium (0.50)       | 0.38                            | 0.38                        |
| <i>GLMN</i>     | ENST00000370360    | ENSP00000359385 | 1:92730179 | 1231         | 411              | S/G       | low (0.25)          | medium (0.50)       | 0.38                            |                             |
| <i>EVI5</i>     | ENST00000540033    | ENSP00000440826 | 1:93163487 | 827          | 276              | L/P       | high (1.00)         | high (1.00)         | 1.00                            | 0.92                        |
| <i>EVI5</i>     | ENST00000370331    | ENSP00000359356 | 1:93163487 | 827          | 276              | L/P       | high (1.00)         | high (1.00)         | 1.00                            |                             |
| <i>EVI5</i>     | ENST00000543509    | ENSP00000445019 | 1:93163487 | 827          | 276              | L/P       | high (1.00)         | medium (0.50)       | 0.75                            |                             |
| <i>EPHX4</i>    | ENST00000370383    | ENSP00000359410 | 1:92528827 | 1073         | 358              | T/K       | low (0.25)          | low (0.25)          | 0.25                            | 0.25                        |
| <i>EPHX4</i>    | ENST00000370383    | ENSP00000359410 | 1:92528830 | 1076         | 359              | R/K       | low (0.25)          | low (0.25)          | 0.25                            |                             |
| <i>EPHX4</i>    | ENST00000370383    | ENSP00000359410 | 1:92508530 | 468          | 156              | D/E       | low (0.25)          | low (0.25)          | 0.25                            |                             |
| <i>DNTTIP2</i>  | ENST00000436063    | ENSP00000411010 | 1:94342244 | 1247         | 416              | G/V       | medium (0.50)       | low (0.25)          | 0.38                            | 0.31                        |
| <i>DNTTIP2</i>  | ENST00000359208    | ENSP00000352137 | 1:94342244 | 1247         | 416              | G/V       | low (0.25)          | low (0.25)          | 0.25                            |                             |
| <i>CDC7</i>     | ENST00000234626    | ENSP00000234626 | 1:91978851 | 809          | 270              | G/E       | low (0.25)          | medium (0.50)       | 0.38                            | 0.38                        |
| <i>CDC7</i>     | ENST00000428239    | ENSP00000393139 | 1:91978851 | 809          | 270              | G/E       | low (0.25)          | medium (0.50)       | 0.38                            |                             |
| <i>CDC7</i>     | ENST00000430031    | ENSP00000407477 | 1:91978851 | 725          | 242              | G/E       | low (0.25)          | medium (0.50)       | 0.38                            |                             |
| <i>BCAR3</i>    | ENST00000370244    | ENSP00000359264 | 1:94140311 | 176          | 59               | P/L       | low (0.25)          | low (0.25)          | 0.25                            | 0.25                        |
| <i>BCAR3</i>    | ENST00000370243    | ENSP00000359263 | 1:94140311 | 176          | 59               | P/L       | low (0.25)          | low (0.25)          | 0.25                            |                             |
| <i>BCAR3</i>    | ENST00000260502    | ENSP00000260502 | 1:94140311 | 176          | 59               | P/L       | low (0.25)          | low (0.25)          | 0.25                            |                             |
| <i>BCAR3</i>    | ENST00000370247    | ENSP00000359267 | 1:94033381 | 1729         | 577              | A/T       | low (0.25)          | low (0.25)          | 0.25                            |                             |
| <i>BCAR3</i>    | ENST00000370244    | ENSP00000359264 | 1:94033381 | 2002         | 668              | A/T       | low (0.25)          | low (0.25)          | 0.25                            |                             |
| <i>BCAR3</i>    | ENST00000539242    | ENSP00000441343 | 1:94033381 | 1030         | 344              | A/T       | low (0.25)          | low (0.25)          | 0.25                            |                             |
| <i>BCAR3</i>    | ENST00000260502    | ENSP00000260502 | 1:94033381 | 2002         | 668              | A/T       | low (0.25)          | low (0.25)          | 0.25                            |                             |
| <i>BCAR3</i>    | ENST00000370243    | ENSP00000359263 | 1:94033381 | 2002         | 668              | A/T       | low (0.25)          | low (0.25)          | 0.25                            |                             |
| <i>ABCA4</i>    | ENST00000370225    | ENSP00000359245 | 1:94546141 | 992          | 331              | G/A       | low (0.25)          | medium (0.50)       | 0.38                            | 0.38                        |
| <i>ABCA4</i>    | ENST00000535735    | ENSP00000437682 | 1:94546141 | 992          | 331              | G/A       | medium (0.50)       | low (0.25)          | 0.38                            |                             |

Supplementary table 6. Probesets differentially expressed between bortezomib responders and non-responders

| Rank # | Probe              | Gene                                                                                        | log2FC        | P adj.       |
|--------|--------------------|---------------------------------------------------------------------------------------------|---------------|--------------|
| 1      | 210532_s_at        | <i>C14orf2</i>                                                                              | -0,408        | 0,002        |
| 2      | 225335_at          | <i>ZNF496</i>                                                                               | -0,540        | 0,002        |
| 3      | 217988_at          | <i>CCNB1IP1</i>                                                                             | -0,590        | 0,002        |
| 4      | 229586_at          | <i>CHD9</i>                                                                                 | 0,424         | 0,008        |
| 5      | 224985_at          | <i>NRAS</i>                                                                                 | -0,470        | 0,008        |
| 6      | 224616_at          | <i>DYNC1LI2</i>                                                                             | 0,459         | 0,014        |
| 7      | 213941_x_at        | <i>RPS7</i>                                                                                 | -0,340        | 0,014        |
| 8      | <b>200937_s_at</b> | <b><i>RPL5 ; SNORD21</i></b>                                                                | <b>-0,553</b> | <b>0,014</b> |
| 9      | 206790_s_at        | <i>NDUFB1</i>                                                                               | -0,388        | 0,019        |
| 10     | 200834_s_at        | <i>RPS21</i>                                                                                | -0,431        | 0,019        |
| 11     | 202232_s_at        | <i>EIF3M</i>                                                                                | -0,521        | 0,019        |
| 12     | 224841_x_at        | <i>GAS5 ; SNORD44 ; SNORD47 ; SNORD74 ; SNORD76 ; SNORD77 ; SNORD79 ; SNORD80 ; SNORD81</i> | -0,854        | 0,019        |
| 13     | 224741_x_at        | <i>GAS5 ; SNORD44 ; SNORD47 ; SNORD74 ; SNORD76 ; SNORD77 ; SNORD79 ; SNORD80 ; SNORD81</i> | -0,879        | 0,019        |
| 14     | 221180_at          | <i>MAP3K19</i>                                                                              | 0,580         | 0,019        |
| 15     | 208752_x_at        | <i>NAP1L1</i>                                                                               | -0,406        | 0,019        |
| 16     | 213846_at          | <i>COX7C</i>                                                                                | -0,394        | 0,019        |
| 17     | 238025_at          | <i>MLKL</i>                                                                                 | 0,607         | 0,019        |
| 18     | 200921_s_at        | <i>BTG1</i>                                                                                 | -0,666        | 0,019        |
| 19     | 201094_at          | <i>RPS29</i>                                                                                | -0,419        | 0,019        |
| 20     | 201592_at          | <i>EIF3H</i>                                                                                | -0,383        | 0,020        |
| 21     | 228539_at          | <i>RP11-258C19.7</i>                                                                        | 0,730         | 0,021        |
| 22     | 200624_s_at        | <i>MATR3 ; SNHG4</i>                                                                        | -0,385        | 0,021        |
| 23     | 217719_at          | <i>EIF3L</i>                                                                                | -0,382        | 0,023        |
| 24     | 208796_s_at        | <i>CCNG1</i>                                                                                | -0,470        | 0,024        |
| 25     | 200903_s_at        | <i>AHCY</i>                                                                                 | -0,480        | 0,024        |
| 26     | 220755_s_at        | <i>C6orf48</i>                                                                              | -0,581        | 0,024        |
| 27     | 225698_at          | <i>EPB41L4A-AS1</i>                                                                         | -0,674        | 0,024        |
| 28     | 235765_at          | <i>TLE4</i>                                                                                 | 0,845         | 0,025        |
| 29     | 213890_x_at        | <i>RPS16</i>                                                                                | -0,340        | 0,025        |
| 30     | 211939_x_at        | <i>BTF3</i>                                                                                 | -0,386        | 0,025        |
| 31     | 208517_x_at        | <i>BTF3</i>                                                                                 | -0,456        | 0,025        |
| 32     | 211938_at          | <i>EIF4B</i>                                                                                | -0,390        | 0,025        |
| 33     | 217491_x_at        | <i>COX7C</i>                                                                                | -0,423        | 0,025        |
| 34     | 239645_at          | ---                                                                                         | 0,636         | 0,026        |
| 35     | 202255_s_at        | <i>SIPA1L1</i>                                                                              | -0,858        | 0,027        |
| 36     | 206621_s_at        | <i>EIF4H</i>                                                                                | -0,273        | 0,029        |
| 37     | 212136_at          | <i>ATP2B4</i>                                                                               | 0,594         | 0,029        |
| 38     | 202605_at          | <i>GUSB</i>                                                                                 | -0,433        | 0,030        |
| 39     | 204122_at          | <i>TYROBP</i>                                                                               | 0,605         | 0,031        |
| 40     | 242921_at          | <i>SGSM1</i>                                                                                | -0,384        | 0,034        |
| 41     | 227787_s_at        | <i>MED30</i>                                                                                | -0,521        | 0,035        |
| 42     | 230769_at          | <i>DENND2C</i>                                                                              | -0,537        | 0,037        |
| 43     | 219939_s_at        | <i>CSDE1</i>                                                                                | -0,405        | 0,037        |
| 44     | 219396_s_at        | <i>MIR631 ; NEIL1</i>                                                                       | 0,619         | 0,037        |
| 45     | 212787_at          | <i>YLPM1</i>                                                                                | -0,260        | 0,037        |
| 46     | 212328_at          | <i>LIMCH1</i>                                                                               | 0,681         | 0,037        |
| 47     | 207542_s_at        | <i>AQP1</i>                                                                                 | 0,774         | 0,037        |
| 48     | 221745_at          | <i>DCAF7</i>                                                                                | 0,327         | 0,037        |
| 49     | 201705_at          | <i>PSMD7</i>                                                                                | 0,318         | 0,037        |
| 50     | 209472_at          | <i>CCBL2</i>                                                                                | -0,375        | 0,037        |
| 51     | 236245_at          | <i>ODF3L1</i>                                                                               | -0,807        | 0,037        |
| 52     | 218601_at          | <i>URGCP</i>                                                                                | -0,600        | 0,037        |
| 53     | 201653_at          | <i>CNIH1</i>                                                                                | -0,497        | 0,037        |
| 54     | 231605_at          | ---                                                                                         | 0,672         | 0,037        |
| 55     | 202010_s_at        | <i>PTGR2 ; ZNF410</i>                                                                       | -0,274        | 0,037        |
| 56     | 200626_s_at        | <i>MATR3 ; SNHG4</i>                                                                        | -0,316        | 0,037        |
| 57     | 200941_at          | <i>HSBP1</i>                                                                                | 0,269         | 0,037        |
| 58     | 201520_s_at        | <i>GRSF1</i>                                                                                | -0,374        | 0,037        |
| 59     | 221434_s_at        | <i>SLIRP</i>                                                                                | -0,380        | 0,037        |
| 60     | 213041_s_at        | <i>ATP5D</i>                                                                                | -0,456        | 0,037        |
| 61     | 202023_at          | <i>EFNA1</i>                                                                                | 0,443         | 0,037        |
| 62     | 208536_s_at        | <i>BCL2L11</i>                                                                              | -0,480        | 0,037        |
| 63     | 203542_s_at        | <i>KLF9</i>                                                                                 | 0,588         | 0,037        |
| 64     | 213376_at          | <i>ZBTB1</i>                                                                                | -0,391        | 0,037        |
| 65     | 219217_at          | <i>NARS2</i>                                                                                | -0,307        | 0,037        |
| 66     | 226835_s_at        | <i>ZFAS1</i>                                                                                | -0,547        | 0,037        |

|     |             |                        |        |       |
|-----|-------------|------------------------|--------|-------|
| 67  | 215011_at   | SNHG3 ; SNORA73A       | 0,400  | 0,037 |
| 68  | 225951_s_at | LOC100507217           | -0,387 | 0,037 |
| 69  | 205404_at   | HSD11B1                | 0,560  | 0,037 |
| 70  | 224874_at   | POLR1D                 | -0,386 | 0,037 |
| 71  | 214714_at   | ZNF394                 | -0,326 | 0,037 |
| 72  | 208764_s_at | ATP5G2                 | -0,357 | 0,037 |
| 73  | 225794_s_at | SMDT1                  | -0,394 | 0,037 |
| 74  | 200909_s_at | RPLP2 ; SNORA52        | -0,387 | 0,039 |
| 75  | 229146_at   | C7orf31                | -0,629 | 0,039 |
| 76  | 217969_at   | VPS51                  | -0,486 | 0,040 |
| 77  | 201258_at   | RPS16                  | -0,412 | 0,040 |
| 78  | 205641_s_at | TRADD                  | 0,554  | 0,040 |
| 79  | 213099_at   | ANGEL1                 | -0,705 | 0,040 |
| 80  | 238656_at   | RAD50                  | 0,293  | 0,040 |
| 81  | 219233_s_at | GSDMB                  | 0,729  | 0,041 |
| 82  | 224915_x_at | ZFAS1                  | -0,581 | 0,041 |
| 83  | 222968_at   | ---                    | -0,973 | 0,041 |
| 84  | 202929_s_at | DDT ; DDTL             | -0,391 | 0,042 |
| 85  | 221475_s_at | RPL15                  | -0,435 | 0,044 |
| 86  | 203590_at   | DYNC11I2               | 0,610  | 0,045 |
| 87  | 205744_at   | DOC2A                  | 0,599  | 0,046 |
| 88  | 219261_at   | C7orf26                | -0,662 | 0,046 |
| 89  | 219065_s_at | DPY30 ; MEMO1          | -0,251 | 0,046 |
| 90  | 225349_at   | ZNF496                 | -0,769 | 0,046 |
| 91  | 222783_s_at | SMOC1                  | -0,761 | 0,047 |
| 92  | 216069_at   | PRMT2                  | 0,610  | 0,048 |
| 93  | 202248_at   | E2F4                   | 0,567  | 0,048 |
| 94  | 225710_at   | GNB4                   | 1,104  | 0,049 |
| 95  | 225333_at   | ZNF496                 | -0,640 | 0,049 |
| 96  | 225230_at   | DRAM2                  | -0,488 | 0,049 |
| 97  | 206874_s_at | SLK                    | 0,290  | 0,051 |
| 98  | 209576_at   | GNAI1                  | 0,513  | 0,051 |
| 99  | 212826_s_at | SLC25A6                | -0,504 | 0,051 |
| 100 | 227640_s_at | RP9 ; RP9P             | -0,316 | 0,051 |
| 101 | 235505_s_at | LRPAP1                 | 0,677  | 0,051 |
| 102 | 226645_at   | ---                    | 0,598  | 0,051 |
| 103 | 208540_x_at | S100A11P1 ; S100A11P1  | 0,368  | 0,051 |
| 104 | 220575_at   | FAM106A                | 0,579  | 0,051 |
| 105 | 217897_at   | FXD6                   | 0,613  | 0,051 |
| 106 | 208697_s_at | EIF3E                  | -0,368 | 0,051 |
| 107 | 200907_s_at | PALLD                  | 0,674  | 0,051 |
| 108 | 223245_at   | STRBP                  | -0,279 | 0,051 |
| 109 | 218101_s_at | NDUFC2 ; NDUFC2-KCTD14 | -0,272 | 0,051 |
| 110 | 41858_at    | PGAP2                  | -0,305 | 0,051 |
| 111 | 214709_s_at | KTN1                   | -0,347 | 0,051 |
| 112 | 213311_s_at | TCF25                  | 0,437  | 0,051 |
| 113 | 221124_s_at | VSX1                   | 0,321  | 0,051 |
| 114 | 200936_at   | RPL8                   | -0,348 | 0,051 |
| 115 | 221978_at   | HLA-F                  | 0,326  | 0,051 |
| 116 | 212681_at   | EPB41L3                | 0,349  | 0,053 |
| 117 | 226227_x_at | ZFAS1                  | -0,533 | 0,054 |
| 118 | 202647_s_at | NRAS                   | -0,425 | 0,054 |
| 119 | 200981_x_at | GNAS                   | -0,380 | 0,055 |
| 120 | 215385_at   | ---                    | 0,603  | 0,056 |
| 121 | 201840_at   | NEDD8                  | -0,288 | 0,056 |
| 122 | 207573_x_at | ATP5L                  | -0,381 | 0,056 |
| 123 | 226169_at   | SBF2                   | -0,523 | 0,056 |
| 124 | 238662_at   | DPH6                   | -0,508 | 0,056 |
| 125 | 213256_at   | 37681                  | 0,471  | 0,056 |
| 126 | 221680_s_at | ETV7                   | 0,423  | 0,057 |
| 127 | 239792_at   | UBL7-AS1               | -0,478 | 0,057 |
| 128 | 210564_x_at | CFLAR                  | 0,349  | 0,057 |
| 129 | 1729_at     | TRADD                  | 0,580  | 0,057 |
| 130 | 202011_at   | TJP1                   | 0,755  | 0,057 |
| 131 | 200860_s_at | CNOT1                  | 0,234  | 0,057 |
| 132 | 211904_x_at | RAD52                  | 0,610  | 0,057 |
| 133 | 204351_at   | S100P                  | 0,622  | 0,058 |
| 134 | 207862_at   | UPK2                   | 0,568  | 0,058 |
| 135 | 210006_at   | ABHD14A ; ACY1         | -0,414 | 0,058 |

|     |             |                            |        |       |
|-----|-------------|----------------------------|--------|-------|
| 136 | 208746_x_at | ATP5L                      | -0,366 | 0,058 |
| 137 | 223714_at   | ZNF256                     | -0,566 | 0,058 |
| 138 | 218869_at   | MLYCD                      | 0,463  | 0,058 |
| 139 | 223025_s_at | AP1M1                      | -0,391 | 0,058 |
| 140 | 212893_at   | ZZZ3                       | -0,273 | 0,058 |
| 141 | 207855_s_at | CLCC1                      | -0,402 | 0,058 |
| 142 | 203568_s_at | TRIM38                     | 0,343  | 0,058 |
| 143 | 215210_s_at | DLST                       | -0,311 | 0,058 |
| 144 | 213687_s_at | RPL35A                     | -0,372 | 0,058 |
| 145 | 212332_at   | RBL2                       | 0,474  | 0,058 |
| 146 | 225190_x_at | RPL35A                     | -0,375 | 0,059 |
| 147 | 201134_x_at | COX7C                      | -0,374 | 0,060 |
| 148 | 205457_at   | C6orf106                   | 0,340  | 0,060 |
| 149 | 226131_s_at | RPS16                      | -0,272 | 0,062 |
| 150 | 222893_s_at | RPAP2                      | -0,381 | 0,063 |
| 151 | 211567_at   | ---                        | 0,431  | 0,065 |
| 152 | 205196_s_at | AP1S1                      | -0,473 | 0,065 |
| 153 | 216570_x_at | RP4-595K12.1               | -0,349 | 0,065 |
| 154 | 200949_x_at | RPS20 ; SNORD54            | -0,267 | 0,065 |
| 155 | 215538_at   | ---                        | 0,377  | 0,065 |
| 156 | 201486_at   | RCN2                       | -0,438 | 0,065 |
| 157 | 218684_at   | LRRC8D                     | -0,319 | 0,065 |
| 158 | 207040_s_at | ST13                       | -0,279 | 0,066 |
| 159 | 234926_s_at | RTFDC1                     | -0,225 | 0,067 |
| 160 | 223847_s_at | ERGIC1                     | -0,331 | 0,067 |
| 161 | 235204_at   | ENTPD7                     | 0,282  | 0,067 |
| 162 | 233268_s_at | CHURC1                     | -0,357 | 0,067 |
| 163 | 219666_at   | MS4A6A                     | 0,606  | 0,067 |
| 164 | 203113_s_at | EEF1D                      | -0,396 | 0,067 |
| 165 | 200826_at   | SNRPD2                     | -0,293 | 0,068 |
| 166 | 200920_s_at | BTG1                       | -0,544 | 0,069 |
| 167 | 211813_x_at | DCN                        | 0,478  | 0,069 |
| 168 | 209475_at   | MIR6125 ; USP15            | 0,297  | 0,069 |
| 169 | 204389_at   | MAOA                       | 0,443  | 0,069 |
| 170 | 231226_at   | MED14OS                    | 0,549  | 0,070 |
| 171 | 228658_at   | MIAT                       | 0,697  | 0,070 |
| 172 | 217433_at   | TACC1                      | 0,144  | 0,070 |
| 173 | 231047_at   | ---                        | 0,492  | 0,070 |
| 174 | 211755_s_at | ATP5F1                     | -0,312 | 0,071 |
| 175 | 227228_s_at | CCDC88C                    | -0,401 | 0,073 |
| 176 | 213071_at   | DPT                        | 0,437  | 0,073 |
| 177 | 238523_at   | KLHL36                     | 0,729  | 0,073 |
| 178 | 212344_at   | SULF1                      | 0,558  | 0,073 |
| 179 | 224862_at   | GNAQ                       | 0,734  | 0,073 |
| 180 | 212085_at   | SLC25A6                    | -0,514 | 0,073 |
| 181 | 203190_at   | MIR4691 ; MIR7113 ; NDUFS8 | -0,215 | 0,073 |
| 182 | 200869_at   | RPL18A ; SNORA68           | -0,384 | 0,074 |
| 183 | 228175_at   | SLC4A8                     | -0,471 | 0,074 |
| 184 | 211747_s_at | LSM5                       | -0,299 | 0,074 |
| 185 | 211666_x_at | RNU86 ; RPL3 ; SNORD83B    | -0,426 | 0,075 |
| 186 | 225714_s_at | ---                        | -0,346 | 0,075 |
| 187 | 210139_s_at | PMP22                      | 0,632  | 0,075 |
| 188 | 213275_x_at | CTSB                       | 0,477  | 0,075 |
| 189 | 207585_s_at | RPL36AL                    | -0,356 | 0,075 |
| 190 | 212135_s_at | ATP2B4                     | 0,445  | 0,076 |
| 191 | 225547_at   | SNHG6 ; SNORD87            | -0,426 | 0,076 |
| 192 | 213995_at   | ATP5S                      | -0,366 | 0,076 |
| 193 | 202231_at   | EIF3M                      | -0,308 | 0,080 |
| 194 | 229388_at   | LOC101929112               | 0,572  | 0,080 |
| 195 | 219577_s_at | ABCA7                      | 0,410  | 0,080 |
| 196 | 214776_x_at | XYLB                       | 0,308  | 0,081 |
| 197 | 224182_x_at | SEMA6B                     | 0,578  | 0,081 |
| 198 | 53987_at    | RANBP10                    | 0,323  | 0,081 |
| 199 | 219429_at   | FA2H                       | 0,629  | 0,084 |
| 200 | 225315_at   | MRPL21                     | -0,261 | 0,084 |
| 201 | 236428_at   | ---                        | 0,690  | 0,085 |
| 202 | 211711_s_at | PTEN                       | -0,325 | 0,085 |
| 203 | 202725_at   | POLR2A                     | 0,401  | 0,085 |
| 204 | 205119_s_at | FPR1                       | 0,405  | 0,085 |

|     |             |                                                                        |        |       |
|-----|-------------|------------------------------------------------------------------------|--------|-------|
| 205 | 222465_at   | RSL24D1                                                                | -0,425 | 0,085 |
| 206 | 217702_at   | IL27RA                                                                 | 0,543  | 0,085 |
| 207 | 228489_at   | TM4SF18                                                                | 0,683  | 0,086 |
| 208 | 214800_x_at | BTF3                                                                   | -0,305 | 0,086 |
| 209 | 56821_at    | SLC38A7                                                                | 0,468  | 0,087 |
| 210 | 37986_at    | EPOR                                                                   | 0,590  | 0,087 |
| 211 | 217729_s_at | AES                                                                    | -0,334 | 0,087 |
| 212 | 227174_at   | WDR72                                                                  | -0,700 | 0,087 |
| 213 | 243692_at   | GATA4                                                                  | 0,586  | 0,087 |
| 214 | 211653_x_at | AKR1C2 ; LOC101930400                                                  | 0,432  | 0,087 |
| 215 | 230131_x_at | ARSD                                                                   | 0,322  | 0,088 |
| 216 | 228726_at   | SERPINB1                                                               | 0,615  | 0,088 |
| 217 | 226296_s_at | MRPS15                                                                 | -0,427 | 0,088 |
| 218 | 212273_x_at | GNAS                                                                   | -0,350 | 0,088 |
| 219 | 215265_at   | ---                                                                    | 0,624  | 0,088 |
| 220 | 200660_at   | S100A11                                                                | 0,815  | 0,088 |
| 221 | 217980_s_at | MRPL16                                                                 | -0,234 | 0,088 |
| 222 | 200963_x_at | RPL31                                                                  | -0,315 | 0,088 |
| 223 | 211374_x_at | ---                                                                    | 0,573  | 0,088 |
| 224 | 239092_at   | ITGA8                                                                  | -0,602 | 0,088 |
| 225 | 200823_x_at | RPL29                                                                  | -0,466 | 0,088 |
| 226 | 214179_s_at | NFE2L1                                                                 | 0,384  | 0,088 |
| 227 | 236840_at   | C12orf56                                                               | -0,544 | 0,089 |
| 228 | 232075_at   | WDR61                                                                  | -0,261 | 0,089 |
| 229 | 224439_x_at | RNF7                                                                   | -0,340 | 0,090 |
| 230 | 224196_x_at | DPH5                                                                   | -0,274 | 0,090 |
| 231 | 226474_at   | NLRC5                                                                  | 0,401  | 0,090 |
| 232 | 210453_x_at | ATP5L                                                                  | -0,324 | 0,090 |
| 233 | 218927_s_at | CHST12                                                                 | -0,397 | 0,090 |
| 234 | 223671_x_at | DPH5                                                                   | -0,258 | 0,090 |
| 235 | 213362_at   | PTPRD                                                                  | 0,526  | 0,090 |
| 236 | 202467_s_at | COPS2                                                                  | -0,387 | 0,090 |
| 237 | 225054_x_at | LINC00674                                                              | 0,561  | 0,090 |
| 238 | 241017_at   | RPL31 ; TBC1D8                                                         | -0,346 | 0,090 |
| 239 | 212240_s_at | PIK3R1                                                                 | 0,298  | 0,091 |
| 240 | 200811_at   | CIRBP                                                                  | -0,337 | 0,091 |
| 241 | 202202_s_at | LAMA4                                                                  | 0,469  | 0,091 |
| 242 | 209397_at   | ME2                                                                    | -0,412 | 0,092 |
| 243 | 211316_x_at | CFLAR                                                                  | 0,341  | 0,092 |
| 244 | 201773_at   | ADNP                                                                   | -0,288 | 0,092 |
| 245 | 214411_x_at | CTRB2                                                                  | 0,367  | 0,092 |
| 246 | 211942_x_at | RPL13A ; RPL13AP5 ; RPL13AP6 ; SNORD32A ; SNORD33 ; SNORD34 ; SNORD35A | -0,408 | 0,092 |
| 247 | 232829_at   | OR52K3P                                                                | 0,677  | 0,092 |
| 248 | 222368_at   | ---                                                                    | 0,335  | 0,092 |
| 249 | 214388_at   | ---                                                                    | 0,472  | 0,092 |
| 250 | 224345_x_at | FAM162A                                                                | -0,429 | 0,092 |
| 251 | 219590_x_at | DPH5                                                                   | -0,222 | 0,094 |
| 252 | 218286_s_at | RNF7                                                                   | -0,269 | 0,094 |
| 253 | 225063_at   | UBL7                                                                   | -0,469 | 0,094 |
| 254 | 219762_s_at | RPL36                                                                  | -0,419 | 0,094 |
| 255 | 241929_at   | ---                                                                    | 0,640  | 0,094 |
| 256 | 201812_s_at | C4orf46 ; TOMM7                                                        | -0,317 | 0,094 |
| 257 | 223165_s_at | IP6K2                                                                  | -0,345 | 0,094 |
| 258 | 215542_at   | ---                                                                    | 0,368  | 0,094 |
| 259 | 209473_at   | ENTPD1                                                                 | 0,478  | 0,094 |
| 260 | 211662_s_at | VDAC2                                                                  | -0,242 | 0,094 |
| 261 | 242715_at   | ZNF536                                                                 | -0,662 | 0,094 |
| 262 | 218495_at   | UXT                                                                    | -0,326 | 0,094 |
| 263 | 225706_at   | GLCC1                                                                  | -0,485 | 0,094 |
| 264 | 214649_s_at | MTMR2                                                                  | -0,537 | 0,094 |
| 265 | 211506_s_at | CXCL8                                                                  | 0,540  | 0,094 |
| 266 | 243771_at   | ---                                                                    | -0,640 | 0,094 |
| 267 | 237176_at   | ---                                                                    | 0,247  | 0,094 |
| 268 | 205220_at   | HCAR3                                                                  | 0,509  | 0,094 |
| 269 | 208635_x_at | NACA                                                                   | -0,335 | 0,094 |
| 270 | 200781_s_at | RPS15A                                                                 | -0,310 | 0,094 |
| 271 | 222975_s_at | CSDE1                                                                  | -0,383 | 0,094 |
| 272 | 221809_at   | RANBP10                                                                | 0,675  | 0,094 |
| 273 | 202783_at   | NNT                                                                    | -0,465 | 0,094 |

|     |             |                                               |        |       |
|-----|-------------|-----------------------------------------------|--------|-------|
| 274 | 209387_s_at | TM4SF1                                        | 0,448  | 0,094 |
| 275 | 212488_at   | COL5A1                                        | 0,589  | 0,094 |
| 276 | 216418_at   | ABCD1P2 ; ABCD1P2                             | 0,338  | 0,094 |
| 277 | 209939_x_at | CFLAR                                         | 0,558  | 0,095 |
| 278 | 223015_at   | EIF2A                                         | -0,319 | 0,095 |
| 279 | 216022_at   | ---                                           | 0,565  | 0,095 |
| 280 | 228950_s_at | WLS                                           | -0,751 | 0,095 |
| 281 | 208308_s_at | GPI                                           | -0,306 | 0,096 |
| 282 | 218314_s_at | C11orf57                                      | -0,245 | 0,096 |
| 283 | 228944_at   | RP4-773N10.4                                  | -0,393 | 0,096 |
| 284 | 218038_at   | ATP5SL                                        | -0,488 | 0,096 |
| 285 | 205043_at   | CFTR                                          | 0,306  | 0,096 |
| 286 | 209012_at   | TRIO                                          | 0,599  | 0,096 |
| 287 | 208323_s_at | ANXA13                                        | -0,562 | 0,096 |
| 288 | 213112_s_at | SQSTM1                                        | 0,418  | 0,098 |
| 289 | 225373_at   | C10orf54                                      | 0,406  | 0,098 |
| 290 | 214484_s_at | SIGMAR1                                       | -0,554 | 0,098 |
| 291 | 225065_x_at | LRR75A-AS1 ; SNORD49A ; SNORD49B ; SNORD65    | -0,515 | 0,098 |
| 292 | 202344_at   | HSF1                                          | -0,502 | 0,098 |
| 293 | 217673_x_at | GNAS                                          | -0,326 | 0,098 |
| 294 | 202803_s_at | ITGB2                                         | 0,456  | 0,098 |
| 295 | 235005_at   | DIS3L                                         | -0,282 | 0,098 |
| 296 | 225700_at   | GLCC1                                         | -0,559 | 0,098 |
| 297 | 221934_s_at | DALRD3                                        | -0,315 | 0,098 |
| 298 | 238436_s_at | ZNF805                                        | 0,201  | 0,098 |
| 299 | 206350_at   | APCS                                          | 0,455  | 0,098 |
| 300 | 203384_s_at | GOLGA1                                        | 0,307  | 0,098 |
| 301 | 211937_at   | EIF4B                                         | -0,350 | 0,098 |
| 302 | 225614_at   | SAAL1                                         | -0,219 | 0,098 |
| 303 | 220942_x_at | FAM162A                                       | -0,321 | 0,098 |
| 304 | 217915_s_at | RSL24D1                                       | -0,360 | 0,098 |
| 305 | 202961_s_at | ARMC2-AS1 ; ATP5J2                            | -0,310 | 0,098 |
| 306 | 204944_at   | PTPRG                                         | -0,860 | 0,098 |
| 307 | 231914_at   | NUDT14                                        | -0,492 | 0,098 |
| 308 | 209151_x_at | TCF3                                          | -0,560 | 0,098 |
| 309 | 214756_x_at | PMS2P1                                        | -0,211 | 0,098 |
| 310 | 221495_s_at | TCF25                                         | 0,278  | 0,099 |
| 311 | 226236_at   | LINC00493                                     | -0,382 | 0,099 |
| 312 | 221667_s_at | HSPB8                                         | 0,557  | 0,100 |
| 313 | 234875_at   | RPL7AP10 ; RPL7AP10                           | -0,375 | 0,100 |
| 314 | 212768_s_at | OLFM4                                         | 0,342  | 0,100 |
| 315 | 229399_at   | CCDC186                                       | 0,308  | 0,100 |
| 316 | 208359_s_at | KCNJ4                                         | 0,572  | 0,100 |
| 317 | 234932_s_at | CDCP1                                         | 0,423  | 0,100 |
| 318 | 35160_at    | LDB1                                          | 0,340  | 0,100 |
| 319 | 205429_s_at | MPP6                                          | -0,589 | 0,100 |
| 320 | 224859_at   | CD276                                         | 0,236  | 0,100 |
| 321 | 213356_x_at | HNRNPA1 ; HNRNPA1L2 ; HNRNPA1P10 ; HNRNPA1P33 | -0,320 | 0,100 |
| 322 | 203973_s_at | CEBPD                                         | 0,620  | 0,100 |
| 323 | 217145_at   | IGK ; IGKC                                    | 0,600  | 0,102 |
| 324 | 227650_at   | HSPA14                                        | -0,293 | 0,102 |
| 325 | 200906_s_at | PALLD                                         | 0,519  | 0,102 |
| 326 | 202649_x_at | RPS19                                         | -0,351 | 0,102 |
| 327 | 200858_s_at | RPS8 ; SNORD38B ; SNORD55                     | -0,323 | 0,102 |
| 328 | 201119_s_at | COX8A                                         | -0,296 | 0,103 |
| 329 | 208178_x_at | TRIO                                          | 0,770  | 0,103 |
| 330 | 212018_s_at | RSL1D1                                        | -0,294 | 0,103 |
| 331 | 200868_s_at | RNF114                                        | -0,207 | 0,103 |
| 332 | 202012_s_at | EXT2                                          | -0,281 | 0,104 |
| 333 | 202026_at   | SDHD                                          | -0,320 | 0,104 |
| 334 | 200651_at   | GNB2L1 ; SNORD95 ; SNORD96A                   | -0,428 | 0,104 |
| 335 | 233909_at   | ---                                           | 0,504  | 0,105 |
| 336 | 228418_at   | EXOC5                                         | -0,546 | 0,105 |
| 337 | 215641_at   | SEC24D                                        | 0,473  | 0,106 |
| 338 | 227333_at   | DCUN1D3                                       | -0,422 | 0,106 |
| 339 | 223193_x_at | FAM162A                                       | -0,422 | 0,106 |
| 340 | 225080_at   | MYO1C                                         | 0,252  | 0,106 |
| 341 | 202615_at   | GNAQ                                          | 0,656  | 0,106 |
| 342 | 209187_at   | DR1                                           | -0,319 | 0,106 |



|     |                    |                                              |               |              |
|-----|--------------------|----------------------------------------------|---------------|--------------|
| 343 | 224935_at          | EIF2S3                                       | -0,283        | 0,106        |
| 344 | 201144_s_at        | EIF2S1                                       | -0,263        | 0,106        |
| 345 | 227168_at          | MIAT                                         | 1,129         | 0,106        |
| 346 | 203720_s_at        | ERCC1                                        | -0,638        | 0,106        |
| 347 | 236157_at          | RBM14-RBM4 ; RBM4                            | -0,537        | 0,106        |
| 348 | 231846_at          | FOXRED2                                      | -0,623        | 0,106        |
| 349 | 37145_at           | GNLY                                         | 0,592         | 0,106        |
| 350 | 213059_at          | CREB3L1                                      | 0,528         | 0,107        |
| 351 | 202096_s_at        | TSPO                                         | 0,385         | 0,107        |
| 352 | 229863_s_at        | ELP6                                         | -0,449        | 0,107        |
| 353 | 241320_at          | ---                                          | 0,522         | 0,107        |
| 354 | 228095_at          | PHF14                                        | -0,345        | 0,107        |
| 355 | 217768_at          | C14orf166                                    | -0,278        | 0,107        |
| 356 | 201637_s_at        | FXR1                                         | -0,341        | 0,107        |
| 357 | 209689_at          | CCDC93                                       | 0,490         | 0,107        |
| 358 | 211967_at          | TMEM123                                      | -0,516        | 0,108        |
| 359 | 215054_at          | EPOR ; RGL3                                  | 0,696         | 0,108        |
| 360 | 203186_s_at        | S100A4                                       | 0,933         | 0,108        |
| 361 | 202588_at          | AK1                                          | 0,456         | 0,108        |
| 362 | 217816_s_at        | PCNP                                         | -0,263        | 0,108        |
| 363 | 227718_at          | MIR4657 ; PURB                               | -0,353        | 0,108        |
| 364 | 205667_at          | WRN                                          | 0,376         | 0,108        |
| 365 | 238459_x_at        | SPATA6                                       | 0,444         | 0,108        |
| 366 | 233824_at          | ---                                          | 0,470         | 0,108        |
| 367 | 208645_s_at        | RPS14                                        | -0,307        | 0,108        |
| 368 | 213821_s_at        | IDS                                          | 0,568         | 0,108        |
| 369 | 204282_s_at        | FARS2                                        | 0,219         | 0,109        |
| 370 | 214080_x_at        | PRKCSH                                       | -0,190        | 0,109        |
| 371 | 201024_x_at        | EIF5B                                        | 0,311         | 0,109        |
| 372 | 201066_at          | CYC1                                         | -0,319        | 0,109        |
| 373 | 214673_s_at        | HUWE1                                        | 0,467         | 0,109        |
| 374 | 229013_at          | LOC145783 ; ZNF280D                          | -0,383        | 0,109        |
| 375 | 202591_s_at        | SSBP1                                        | -0,311        | 0,109        |
| 376 | 209160_at          | AKR1C3                                       | 0,802         | 0,109        |
| 377 | 200595_s_at        | EIF3A                                        | -0,215        | 0,110        |
| 378 | 209018_s_at        | PINK1                                        | 0,249         | 0,110        |
| 379 | 214687_x_at        | ALDOA                                        | -0,282        | 0,110        |
| 380 | 212007_at          | UBXN4                                        | 0,270         | 0,110        |
| 381 | 224931_at          | SLC41A3                                      | -0,359        | 0,110        |
| 382 | 201405_s_at        | COPS6                                        | -0,194        | 0,111        |
| 383 | 204661_at          | CD52                                         | 0,965         | 0,111        |
| 384 | 211581_x_at        | LST1                                         | 0,652         | 0,111        |
| 385 | 223157_at          | NOA1                                         | -0,363        | 0,111        |
| 386 | 209330_s_at        | HNRNPD                                       | -0,254        | 0,111        |
| 387 | <b>213080_x_at</b> | <b>RPL5 ; SNORD21</b>                        | <b>-0,340</b> | <b>0,112</b> |
| 388 | 225846_at          | ESRP1                                        | 0,874         | 0,112        |
| 389 | 243005_at          | ---                                          | 0,553         | 0,112        |
| 390 | 219291_at          | DTWD1                                        | -0,375        | 0,112        |
| 391 | 227525_at          | GLCCI1                                       | -0,530        | 0,112        |
| 392 | 203530_s_at        | STX4                                         | 0,261         | 0,112        |
| 393 | 238507_at          | ---                                          | -0,258        | 0,112        |
| 394 | 229344_x_at        | RIMKLB                                       | 0,323         | 0,112        |
| 395 | 207643_s_at        | TNFRSF1A                                     | 0,502         | 0,112        |
| 396 | 200846_s_at        | PPP1CA                                       | -0,283        | 0,112        |
| 397 | 213539_at          | CD3D                                         | 0,576         | 0,112        |
| 398 | 213414_s_at        | RPS19                                        | -0,305        | 0,112        |
| 399 | 216072_at          | DSTNP1 ; DSTNP1                              | 0,487         | 0,112        |
| 400 | 201825_s_at        | SCCPDH                                       | -0,693        | 0,112        |
| 401 | 205226_at          | PDGFRL                                       | 0,525         | 0,113        |
| 402 | 220534_at          | LOC101930235 ; TRIM48 ; TRIM49D1 ; TRIM49D2P | 0,431         | 0,113        |
| 403 | 208699_x_at        | TKT                                          | -0,377        | 0,113        |
| 404 | 47083_at           | C7orf26                                      | -0,192        | 0,113        |
| 405 | 200726_at          | PPP1CC                                       | -0,238        | 0,113        |
| 406 | 209136_s_at        | USP10                                        | 0,323         | 0,113        |
| 407 | 231186_at          | LINC00643                                    | -0,675        | 0,113        |
| 408 | 201532_at          | PSMA3                                        | -0,387        | 0,113        |
| 409 | 224768_at          | IWS1                                         | 0,186         | 0,113        |
| 410 | 212315_s_at        | NUP210                                       | -0,500        | 0,113        |
| 411 | 234102_at          | RASL11B                                      | 0,516         | 0,113        |

|     |             |                                                 |        |       |
|-----|-------------|-------------------------------------------------|--------|-------|
| 412 | 206174_s_at | PPP6C                                           | -0,264 | 0,113 |
| 413 | 210357_s_at | SMOX                                            | 0,633  | 0,113 |
| 414 | 208854_s_at | STK24                                           | -0,278 | 0,113 |
| 415 | 219607_s_at | MS4A4A                                          | 0,437  | 0,113 |
| 416 | 208717_at   | OXA1L                                           | -0,358 | 0,114 |
| 417 | 225040_s_at | RPE                                             | -0,579 | 0,115 |
| 418 | 230306_at   | VPS26B                                          | -0,342 | 0,115 |
| 419 | 221691_x_at | NPM1                                            | -0,428 | 0,115 |
| 420 | 204317_at   | GTSE1 ; TRMU                                    | 0,446  | 0,115 |
| 421 | 200735_x_at | NACA                                            | -0,306 | 0,115 |
| 422 | 201682_at   | PMPCB                                           | -0,278 | 0,115 |
| 423 | 219526_at   | C14orf169                                       | -0,208 | 0,115 |
| 424 | 233931_at   | ---                                             | 0,597  | 0,115 |
| 425 | 201893_x_at | DCN                                             | 0,367  | 0,115 |
| 426 | 213864_s_at | NAP1L1                                          | -0,361 | 0,115 |
| 427 | 234980_at   | TMEM56                                          | 0,650  | 0,115 |
| 428 | 217485_x_at | PMS2P1                                          | -0,215 | 0,116 |
| 429 | 214880_x_at | CALD1                                           | 0,456  | 0,116 |
| 430 | 202920_at   | ANK2                                            | 0,449  | 0,116 |
| 431 | 238461_at   | EIF4E3                                          | -0,469 | 0,116 |
| 432 | 204005_s_at | PAWR                                            | -0,373 | 0,116 |
| 433 | 222997_s_at | MRPS21                                          | -0,388 | 0,116 |
| 434 | 201154_x_at | RPL4 ; SNORD16 ; SNORD18A ; SNORD18B ; SNORD18C | -0,377 | 0,116 |
| 435 | 210666_at   | IDS                                             | 0,816  | 0,116 |
| 436 | 223191_at   | COX16                                           | -0,257 | 0,116 |
| 437 | 202991_at   | STARD3                                          | 0,403  | 0,116 |
| 438 | 206358_at   | PRM1                                            | 0,314  | 0,116 |
| 439 | 211993_at   | WNK1                                            | 0,518  | 0,117 |
| 440 | 218316_at   | TIMM9                                           | -0,202 | 0,117 |
| 441 | 208742_s_at | SAP18                                           | -0,270 | 0,117 |
| 442 | 230032_at   | OSGEPL1                                         | -0,264 | 0,117 |
| 443 | 216342_x_at | RPS4XP2 ; RPS4XP2                               | -0,293 | 0,117 |
| 444 | 213274_s_at | CTSB                                            | 0,275  | 0,117 |
| 445 | 226448_at   | FAM89A ; MIR1182                                | 0,278  | 0,117 |
| 446 | 224936_at   | EIF2S3                                          | -0,278 | 0,117 |
| 447 | 219483_s_at | PORCN                                           | -0,196 | 0,117 |
| 448 | 206860_s_at | MIOS                                            | -0,193 | 0,117 |
| 449 | 204433_s_at | SPATA2                                          | -0,490 | 0,117 |
| 450 | 208438_s_at | FGR                                             | 0,696  | 0,117 |
| 451 | 213193_x_at | TRBC1                                           | 0,374  | 0,117 |
| 452 | 213762_x_at | LOC101928747 ; RBMX ; SNORD61                   | -0,249 | 0,117 |
| 453 | 226231_at   | PAWR                                            | -0,520 | 0,117 |
| 454 | 212750_at   | PPP1R16B                                        | -0,826 | 0,117 |
| 455 | 219543_at   | PBLD                                            | 0,428  | 0,117 |
| 456 | 213860_x_at | CSNK1A1                                         | -0,208 | 0,117 |
| 457 | 203325_s_at | COL5A1                                          | 0,528  | 0,117 |
| 458 | 212041_at   | ATP6VOD1                                        | 0,266  | 0,117 |
| 459 | 219332_at   | MICALL2                                         | 0,623  | 0,117 |
| 460 | 244379_at   | LOC101927507                                    | 0,619  | 0,117 |
| 461 | 203258_at   | DRAP1                                           | -0,313 | 0,117 |
| 462 | 217926_at   | C19orf53                                        | -0,293 | 0,117 |
| 463 | 228159_at   | WDFY2                                           | 0,501  | 0,117 |
| 464 | 239265_at   | SLC35G1                                         | -0,556 | 0,117 |
| 465 | 228765_at   | GTF2IRD2                                        | -0,227 | 0,117 |
| 466 | 226505_x_at | USP32                                           | 0,438  | 0,117 |
| 467 | 220774_at   | DYM                                             | 0,395  | 0,117 |
| 468 | 213382_at   | MST1L                                           | 0,405  | 0,117 |
| 469 | 217747_s_at | RPS9                                            | -0,358 | 0,117 |
| 470 | 203489_at   | SIVA1                                           | -0,311 | 0,117 |
| 471 | 226100_at   | KMT2E                                           | -0,293 | 0,117 |
| 472 | 219535_at   | HUNK                                            | 0,337  | 0,117 |
| 473 | 212982_at   | ZDHC17                                          | 0,305  | 0,117 |
| 474 | 208247_at   | ERC2-IT1                                        | 0,558  | 0,118 |
| 475 | 223029_s_at | TRAF7                                           | -0,466 | 0,119 |
| 476 | 228389_at   | ---                                             | 0,544  | 0,119 |
| 477 | 223296_at   | SLC25A33                                        | -0,401 | 0,120 |
| 478 | 209508_x_at | CFLAR                                           | 0,333  | 0,120 |
| 479 | 200705_s_at | EEF1B2 ; SNORA41                                | -0,335 | 0,120 |
| 480 | 210153_s_at | ME2                                             | -0,445 | 0,120 |

|     |             |                                                                  |        |       |
|-----|-------------|------------------------------------------------------------------|--------|-------|
| 481 | 235705_at   | ---                                                              | 0,729  | 0,120 |
| 482 | 223279_s_at | UACA                                                             | 0,700  | 0,120 |
| 483 | 209878_s_at | RELA                                                             | -0,358 | 0,120 |
| 484 | 212967_x_at | NAP1L1                                                           | -0,332 | 0,120 |
| 485 | 203829_at   | ELP4                                                             | -0,279 | 0,120 |
| 486 | 209063_x_at | PAIP1                                                            | -0,256 | 0,121 |
| 487 | 227197_at   | ARHGEF26                                                         | 0,431  | 0,121 |
| 488 | 205022_s_at | FOXN3                                                            | -0,349 | 0,121 |
| 489 | 213969_x_at | RPL29                                                            | -0,359 | 0,121 |
| 490 | 226058_at   | B3GNT9                                                           | 0,261  | 0,121 |
| 491 | 201420_s_at | WDR77                                                            | -0,457 | 0,121 |
| 492 | 210205_at   | B3GALT4                                                          | 0,553  | 0,121 |
| 493 | 226246_at   | KCTD1                                                            | -0,541 | 0,121 |
| 494 | 207818_s_at | HTR7                                                             | 0,272  | 0,121 |
| 495 | 218398_at   | MRPS30                                                           | -0,256 | 0,121 |
| 496 | 232962_x_at | ---                                                              | 0,515  | 0,121 |
| 497 | 202041_s_at | FIBP                                                             | -0,262 | 0,121 |
| 498 | 209625_at   | PIGH                                                             | -0,550 | 0,122 |
| 499 | 226014_at   | ---                                                              | -0,503 | 0,122 |
| 500 | 201554_x_at | GYG1                                                             | -0,454 | 0,122 |
| 501 | 204555_s_at | PPP1R3D                                                          | 0,580  | 0,122 |
| 502 | 226289_at   | CAPRIN1                                                          | -0,591 | 0,122 |
| 503 | 227825_at   | NAIF1                                                            | -0,222 | 0,122 |
| 504 | 243198_at   | TEX9                                                             | 0,802  | 0,122 |
| 505 | 210949_s_at | EIF3C ; EIF3CL                                                   | -0,265 | 0,122 |
| 506 | 200818_at   | ATP5O                                                            | -0,313 | 0,122 |
| 507 | 218258_at   | POLR1D                                                           | -0,314 | 0,123 |
| 508 | 240656_at   | ---                                                              | -0,542 | 0,123 |
| 509 | 208887_at   | EIF3G                                                            | -0,324 | 0,123 |
| 510 | 217878_s_at | CDC27                                                            | 0,239  | 0,123 |
| 511 | 202948_at   | IL1R1                                                            | 0,504  | 0,123 |
| 512 | 214688_at   | TLE4                                                             | 0,343  | 0,123 |
| 513 | 202771_at   | PIEZO1                                                           | 0,580  | 0,123 |
| 514 | 232445_at   | SYT9                                                             | 0,565  | 0,123 |
| 515 | 229938_at   | TMEM238                                                          | -0,591 | 0,123 |
| 516 | 209607_x_at | LOC101929857 ; SLX1A-SULT1A3 ; SLX1B-SULT1A4 ; SULT1A3 ; SULT1A4 | 0,319  | 0,123 |
| 517 | 205315_s_at | SNB2                                                             | 0,508  | 0,123 |
| 518 | 224857_s_at | POLR1D                                                           | -0,679 | 0,123 |
| 519 | 201892_s_at | IMPDH2                                                           | -0,449 | 0,123 |
| 520 | 210314_x_at | TNFSF13                                                          | 0,693  | 0,123 |
| 521 | 235415_at   | RPRD2                                                            | -0,245 | 0,123 |
| 522 | 211927_x_at | EEF1G ; MIR3654                                                  | -0,270 | 0,123 |
| 523 | 221437_s_at | MRPS15                                                           | -0,529 | 0,123 |
| 524 | 215602_at   | FGD2                                                             | 0,387  | 0,123 |
| 525 | 234339_s_at | GLTSCR2 ; SNORD23                                                | -0,426 | 0,123 |
| 526 | 228851_s_at | ENSA                                                             | -0,855 | 0,123 |
| 527 | 208669_s_at | EID1                                                             | -0,427 | 0,123 |
| 528 | 221571_at   | TRAF3                                                            | -0,451 | 0,123 |
| 529 | 1316_at     | THRA                                                             | 0,284  | 0,123 |
| 530 | 203567_s_at | TRIM38                                                           | 0,282  | 0,123 |
| 531 | 209286_at   | CDC42EP3                                                         | -0,450 | 0,123 |
| 532 | 216348_at   | RPS17P5 ; RPS17P5                                                | -0,405 | 0,123 |
| 533 | 209382_at   | POLR3C                                                           | -0,264 | 0,124 |
| 534 | 218729_at   | LXN                                                              | 0,528  | 0,124 |
| 535 | 224863_at   | GNAQ                                                             | 0,510  | 0,124 |
| 536 | 201106_at   | GPX4                                                             | -0,275 | 0,124 |
| 537 | 211428_at   | SERPINA1                                                         | 0,420  | 0,124 |
| 538 | 235214_at   | LURAP1                                                           | -0,504 | 0,124 |
| 539 | 234438_at   | ---                                                              | 0,352  | 0,125 |
| 540 | 203849_s_at | KIF1A                                                            | 0,566  | 0,125 |
| 541 | 240986_at   | LOC101928943                                                     | 0,535  | 0,125 |
| 542 | 226574_at   | PSPC1                                                            | -0,268 | 0,125 |
| 543 | 219033_at   | PARP8                                                            | -0,259 | 0,125 |
| 544 | 227281_at   | SLC29A4                                                          | -0,443 | 0,125 |
| 545 | 243954_at   | LINC00877                                                        | 0,681  | 0,125 |
| 546 | 223474_at   | IRF2BPL                                                          | -0,398 | 0,126 |
| 547 | 224825_at   | DNTTIP1                                                          | -0,549 | 0,126 |
| 548 | 212425_at   | SCAMP1                                                           | 0,281  | 0,126 |
| 549 | 230166_at   | KIAA1958                                                         | -0,454 | 0,126 |

|     |             |                                                             |        |       |
|-----|-------------|-------------------------------------------------------------|--------|-------|
| 550 | 243901_at   | ALDOB                                                       | -0,422 | 0,127 |
| 551 | 230582_at   | HECA                                                        | 0,482  | 0,127 |
| 552 | 244623_at   | KCNQ5                                                       | -0,414 | 0,127 |
| 553 | 212790_x_at | RPL13A ; RPL13AP5 ; SNORD32A ; SNORD33 ; SNORD34 ; SNORD35A | -0,295 | 0,127 |
| 554 | 34210_at    | CD52                                                        | 0,853  | 0,127 |
| 555 | 201043_s_at | ANP32A                                                      | -0,427 | 0,129 |
| 556 | 204976_s_at | AMMECR1                                                     | 0,358  | 0,129 |
| 557 | 205797_s_at | TCP11L1                                                     | -0,451 | 0,129 |
| 558 | 217503_at   | STK17B                                                      | -0,327 | 0,129 |
| 559 | 200635_s_at | PTPRF                                                       | 0,545  | 0,130 |
| 560 | 204031_s_at | PCBP2                                                       | -0,294 | 0,130 |
| 561 | 219181_at   | LIPG                                                        | 0,407  | 0,130 |
| 562 | 217034_at   | LOC101928457                                                | 0,413  | 0,130 |
| 563 | 212680_x_at | PPP1R14B                                                    | -0,364 | 0,130 |
| 564 | 226165_at   | C8orf59                                                     | -0,254 | 0,131 |
| 565 | 202233_s_at | UQCRH ; UQCRHL                                              | -0,294 | 0,131 |
| 566 | 211896_s_at | DCN                                                         | 0,411  | 0,132 |
| 567 | 217761_at   | ADI1                                                        | 0,310  | 0,132 |
| 568 | 207926_at   | GP5                                                         | 0,451  | 0,132 |
| 569 | 201732_s_at | CLCN3                                                       | 0,306  | 0,132 |
| 570 | 217728_at   | S100A6                                                      | 0,705  | 0,132 |
| 571 | 213319_s_at | YBX3                                                        | 0,456  | 0,132 |
| 572 | 231182_at   | WIPF1                                                       | -0,323 | 0,132 |
| 573 | 208131_s_at | PTGIS                                                       | 0,512  | 0,132 |
| 574 | 232279_at   | JADE2                                                       | 0,426  | 0,132 |
| 575 | 226894_at   | SLC35A3                                                     | -0,292 | 0,132 |
| 576 | 219293_s_at | OLA1                                                        | -0,248 | 0,132 |
| 577 | 223260_s_at | POLK                                                        | -0,344 | 0,132 |
| 578 | 225237_s_at | MSI2                                                        | -0,422 | 0,132 |
| 579 | 216089_at   | MCFD2P1 ; MCFD2P1                                           | 0,364  | 0,132 |
| 580 | 222513_s_at | SORBS1                                                      | 0,424  | 0,132 |
| 581 | 211771_s_at | POU2F2                                                      | 0,527  | 0,132 |
| 582 | 204006_s_at | FCGR3A ; FCGR3B                                             | 0,554  | 0,132 |
| 583 | 240009_at   | LINC00334                                                   | -0,297 | 0,132 |
| 584 | 212599_at   | AUTS2                                                       | 0,546  | 0,132 |
| 585 | 211553_x_at | APAF1                                                       | 0,414  | 0,132 |
| 586 | 218561_s_at | LYRM4                                                       | -0,338 | 0,132 |
| 587 | 242325_at   | YWHAH                                                       | 0,355  | 0,133 |
| 588 | 202469_s_at | CPSF6                                                       | -0,197 | 0,133 |
| 589 | 222502_s_at | UFM1                                                        | -0,339 | 0,133 |
| 590 | 217617_at   | ---                                                         | 0,527  | 0,133 |
| 591 | 222762_x_at | LIMD1                                                       | -0,411 | 0,133 |
| 592 | 222497_x_at | NMD3                                                        | -0,337 | 0,133 |
| 593 | 201117_s_at | CPE                                                         | 0,263  | 0,133 |
| 594 | 211455_at   | ---                                                         | -0,495 | 0,133 |
| 595 | 201016_at   | EIF1AX                                                      | -0,274 | 0,133 |
| 596 | 203832_at   | SNRPF                                                       | -0,351 | 0,133 |
| 597 | 220994_s_at | STXBP6                                                      | -0,747 | 0,133 |
| 598 | 228013_at   | PPP2R2A                                                     | 0,261  | 0,133 |
| 599 | 215067_x_at | PRDX2                                                       | 0,618  | 0,134 |
| 600 | 214408_s_at | RFPL1S ; RFPL3S                                             | 0,319  | 0,135 |
| 601 | 241784_x_at | HELQ                                                        | 0,606  | 0,135 |
| 602 | 219658_at   | PTCD2                                                       | 0,357  | 0,135 |
| 603 | 212503_s_at | DIP2C                                                       | 0,372  | 0,135 |
| 604 | 215630_at   | ---                                                         | 0,508  | 0,137 |
| 605 | 231005_at   | ---                                                         | 0,524  | 0,137 |
| 606 | 204256_at   | ELOVL6                                                      | 0,429  | 0,137 |
| 607 | 208289_s_at | EI24                                                        | -0,244 | 0,137 |
| 608 | 215395_x_at | PRSS3P2                                                     | 0,591  | 0,137 |
| 609 | 238729_x_at | SAV1                                                        | -0,571 | 0,137 |
| 610 | 204362_at   | SKAP2                                                       | 0,527  | 0,137 |
| 611 | 213601_at   | SLIT1                                                       | 0,310  | 0,137 |
| 612 | 243184_at   | ---                                                         | 0,703  | 0,137 |
| 613 | 236741_at   | WDR72                                                       | -0,561 | 0,138 |
| 614 | 219946_x_at | MYH14                                                       | 0,297  | 0,138 |
| 615 | 209036_s_at | MDH2                                                        | -0,287 | 0,139 |
| 616 | 201406_at   | RPL36A ; RPL36A-HNRNPH2                                     | -0,328 | 0,139 |
| 617 | 214486_x_at | CFLAR                                                       | 0,251  | 0,139 |
| 618 | 234000_s_at | PTPLAD1                                                     | -0,291 | 0,139 |

|     |             |                       |        |       |
|-----|-------------|-----------------------|--------|-------|
| 619 | 213729_at   | PRPF40A               | 0,162  | 0,140 |
| 620 | 208428_at   | TAP2                  | 0,473  | 0,140 |
| 621 | 209591_s_at | BMP7                  | 0,554  | 0,140 |
| 622 | 208756_at   | EIF3I                 | -0,156 | 0,140 |
| 623 | 211987_at   | TOP2B                 | -0,222 | 0,140 |
| 624 | 225312_at   | COMMD6                | -0,331 | 0,141 |
| 625 | 210563_x_at | CFLAR                 | 0,476  | 0,141 |
| 626 | 239304_at   | MFSD4                 | -0,480 | 0,141 |
| 627 | 230379_x_at | NDUFAF7               | 0,358  | 0,141 |
| 628 | 215556_at   | ---                   | 0,274  | 0,141 |
| 629 | 231530_s_at | C11orf1               | -0,439 | 0,141 |
| 630 | 233252_s_at | STRBP                 | -0,302 | 0,141 |
| 631 | 220424_at   | NPHS2                 | 0,471  | 0,141 |
| 632 | 208128_x_at | KIF25                 | 0,429  | 0,141 |
| 633 | 200674_s_at | RPL32                 | -0,243 | 0,141 |
| 634 | 212716_s_at | EIF3K                 | -0,274 | 0,141 |
| 635 | 207644_at   | FOXH1                 | 0,537  | 0,141 |
| 636 | 221369_at   | MTNR1A                | 0,445  | 0,141 |
| 637 | 243255_at   | ---                   | 0,651  | 0,141 |
| 638 | 227194_at   | FAM3B                 | -0,796 | 0,142 |
| 639 | 204563_at   | SELL                  | 0,696  | 0,143 |
| 640 | 236719_at   | LOC100506299          | 0,502  | 0,144 |
| 641 | 221744_at   | DCAF7                 | 0,194  | 0,144 |
| 642 | 240250_at   | ---                   | -0,494 | 0,144 |
| 643 | 207654_x_at | DR1                   | -0,305 | 0,145 |
| 644 | 217972_at   | CHCHD3                | -0,248 | 0,145 |
| 645 | 206027_at   | S100A3                | 0,495  | 0,146 |
| 646 | 204118_at   | CD48                  | -0,587 | 0,146 |
| 647 | 200780_x_at | GNAS                  | -0,261 | 0,146 |
| 648 | 205640_at   | ALDH3B1               | 0,483  | 0,146 |
| 649 | 202577_s_at | DDX19A                | 0,240  | 0,146 |
| 650 | 222035_s_at | PAPOLA                | -0,314 | 0,146 |
| 651 | 221446_at   | ADAM30                | 0,405  | 0,147 |
| 652 | 32128_at    | CCL18                 | 0,480  | 0,147 |
| 653 | 210470_x_at | NONO                  | -0,348 | 0,148 |
| 654 | 204980_at   | CLOCK                 | 0,235  | 0,148 |
| 655 | 202752_x_at | SLC7A8                | 0,383  | 0,148 |
| 656 | 223389_s_at | ZNF581                | -0,458 | 0,148 |
| 657 | 217069_at   | KMT2B                 | 0,378  | 0,148 |
| 658 | 207824_s_at | MAZ                   | -0,401 | 0,148 |
| 659 | 209388_at   | PAPOLA                | -0,316 | 0,148 |
| 660 | 218675_at   | SLC22A17              | 0,783  | 0,148 |
| 661 | 225795_at   | SMDT1                 | -0,659 | 0,148 |
| 662 | 222445_at   | SLC39A9               | -0,243 | 0,148 |
| 663 | 41577_at    | PPP1R16B              | -0,773 | 0,148 |
| 664 | 212433_x_at | RPS2 ; SNORA64        | -0,407 | 0,148 |
| 665 | 236190_at   | LOC102723692          | -0,453 | 0,149 |
| 666 | 225724_at   | FLJ31306              | -0,332 | 0,149 |
| 667 | 217174_s_at | APC2                  | 0,227  | 0,150 |
| 668 | 205590_at   | RASGRP1               | 0,864  | 0,150 |
| 669 | 220872_at   | PRO2964               | 0,432  | 0,150 |
| 670 | 210809_s_at | POSTN                 | 0,522  | 0,150 |
| 671 | 219393_s_at | AKT3                  | 0,316  | 0,150 |
| 672 | 218253_s_at | EIF2D                 | -0,243 | 0,150 |
| 673 | 221167_s_at | CCDC70                | 0,442  | 0,150 |
| 674 | 243766_s_at | TEAD2                 | 0,349  | 0,150 |
| 675 | 218141_at   | UBE2O                 | 0,658  | 0,150 |
| 676 | 213415_at   | CLIC2                 | 0,811  | 0,150 |
| 677 | 226715_at   | FOKK1                 | -0,216 | 0,150 |
| 678 | 203998_s_at | SYT1                  | -0,594 | 0,150 |
| 679 | 218983_at   | C1RL                  | 0,359  | 0,151 |
| 680 | 241189_at   | ---                   | 0,369  | 0,151 |
| 681 | 200765_x_at | CTNNA1                | 0,235  | 0,151 |
| 682 | 225502_at   | DOCK8                 | -0,343 | 0,151 |
| 683 | 226594_at   | ENTPD5                | -0,250 | 0,151 |
| 684 | 215499_at   | LOC100996792 ; MAP2K3 | 0,397  | 0,152 |
| 685 | 227572_at   | USP30                 | -0,399 | 0,152 |
| 686 | 215633_x_at | LST1                  | 0,668  | 0,152 |
| 687 | 220829_s_at | B3GALT1               | 0,241  | 0,152 |

|     |             |                                                                  |        |       |
|-----|-------------|------------------------------------------------------------------|--------|-------|
| 688 | 209500_x_at | TNFSF12-TNFSF13 ; TNFSF13                                        | 0,424  | 0,152 |
| 689 | 202236_s_at | SLC16A1                                                          | -0,270 | 0,152 |
| 690 | 209150_s_at | IPO4 ; TM9SF1                                                    | -0,253 | 0,152 |
| 691 | 205050_s_at | MAPK8IP2                                                         | 0,344  | 0,152 |
| 692 | 213803_at   | KPNB1                                                            | 0,254  | 0,152 |
| 693 | 224060_s_at | DPH5                                                             | -0,365 | 0,152 |
| 694 | 210580_x_at | LOC101929857 ; SLX1A-SULT1A3 ; SLX1B-SULT1A4 ; SULT1A3 ; SULT1A4 | 0,346  | 0,152 |
| 695 | 236215_at   | ---                                                              | 0,609  | 0,152 |
| 696 | 214436_at   | FBXL2                                                            | 0,450  | 0,152 |
| 697 | 224689_at   | MANBAL                                                           | -0,283 | 0,152 |
| 698 | 212807_s_at | SORT1                                                            | -0,518 | 0,152 |
| 699 | 212341_at   | YIPF6                                                            | 0,221  | 0,152 |
| 700 | 231228_at   | BCL2L1                                                           | 0,392  | 0,152 |
| 701 | 232834_at   | ---                                                              | 0,256  | 0,152 |
| 702 | 223100_s_at | NUDT5                                                            | -0,277 | 0,152 |
| 703 | 227672_at   | MROH6                                                            | 0,290  | 0,152 |
| 704 | 229578_at   | JPH2                                                             | 0,488  | 0,152 |
| 705 | 225606_at   | BCL2L11                                                          | -0,344 | 0,152 |
| 706 | 208254_at   | ---                                                              | 0,285  | 0,152 |
| 707 | 209280_at   | MRC2                                                             | 0,326  | 0,152 |
| 708 | 201218_at   | CTBP2                                                            | 0,545  | 0,152 |
| 709 | 217175_at   | ---                                                              | 0,322  | 0,152 |
| 710 | 208822_s_at | DAP3                                                             | -0,309 | 0,152 |
| 711 | 225994_at   | CPSF2                                                            | -0,312 | 0,152 |
| 712 | 203628_at   | IGF1R                                                            | 0,598  | 0,152 |
| 713 | 213418_at   | HSPA6                                                            | 0,718  | 0,152 |
| 714 | 206958_s_at | UPF3A                                                            | -0,302 | 0,152 |
| 715 | 214548_x_at | GNAS                                                             | -0,278 | 0,152 |
| 716 | 236934_at   | ---                                                              | 0,425  | 0,152 |
| 717 | 52837_at    | KIAA1644                                                         | 0,453  | 0,152 |
| 718 | 202480_s_at | DEDD                                                             | -0,368 | 0,152 |
| 719 | 202516_s_at | DLG1                                                             | -0,311 | 0,152 |
| 720 | 211678_s_at | RNF114                                                           | -0,213 | 0,152 |
| 721 | 240274_at   | ---                                                              | 0,332  | 0,152 |
| 722 | 211270_x_at | PTBP1                                                            | -0,176 | 0,152 |
| 723 | 222453_at   | CYBRD1                                                           | 0,718  | 0,152 |
| 724 | 236368_at   | KIAA0368                                                         | 0,272  | 0,152 |
| 725 | 223908_at   | HDAC8                                                            | -0,484 | 0,152 |
| 726 | 201615_x_at | CALD1                                                            | 0,483  | 0,152 |
| 727 | 202299_s_at | LAMTOR5                                                          | -0,199 | 0,152 |
| 728 | 225117_at   | KANSL1                                                           | -0,222 | 0,152 |
| 729 | 216383_at   | RPL18AP16 ; RPL18AP16                                            | -0,388 | 0,152 |
| 730 | 224304_x_at | NIN                                                              | -0,407 | 0,152 |
| 731 | 222290_at   | OR2A20P ; OR2A9P                                                 | 0,513  | 0,152 |
| 732 | 200990_at   | TRIM28                                                           | -0,252 | 0,153 |
| 733 | 1861_at     | BAD                                                              | -0,233 | 0,153 |
| 734 | 211181_x_at | LOC100506403 ; LOC101928269 ; RUNX1                              | -0,534 | 0,153 |
| 735 | 224248_x_at | FAM192A                                                          | 0,252  | 0,153 |
| 736 | 242311_x_at | ---                                                              | 0,378  | 0,153 |
| 737 | 49306_at    | RASSF4                                                           | 0,534  | 0,154 |
| 738 | 207220_at   | ART4                                                             | 0,481  | 0,154 |
| 739 | 209073_s_at | LOC101928143 ; LOC101930388 ; NUMB                               | -0,393 | 0,154 |
| 740 | 220606_s_at | ADPRM                                                            | -0,476 | 0,154 |
| 741 | 222360_at   | DPH5                                                             | -0,373 | 0,154 |
| 742 | 238616_at   | QDPR                                                             | -0,400 | 0,154 |
| 743 | 231008_at   | UNC5CL                                                           | 0,228  | 0,154 |
| 744 | 201517_at   | NCBP2                                                            | -0,223 | 0,154 |
| 745 | 217596_at   | UPF3A                                                            | -0,406 | 0,154 |
| 746 | 219922_s_at | LTBP3                                                            | -0,612 | 0,154 |
| 747 | 224589_at   | XIST                                                             | -0,917 | 0,154 |
| 748 | 227711_at   | GTSF1                                                            | -0,494 | 0,155 |
| 749 | 200715_x_at | RPL13A ; SNORD32A ; SNORD33 ; SNORD34 ; SNORD35A                 | -0,494 | 0,155 |
| 750 | 209013_x_at | TRIO                                                             | 0,613  | 0,155 |
| 751 | 220859_at   | ---                                                              | 0,460  | 0,155 |
| 752 | 232904_at   | SLC7A14                                                          | 0,383  | 0,155 |
| 753 | 234646_at   | ---                                                              | 0,423  | 0,155 |
| 754 | 215963_x_at | RPL3                                                             | -0,367 | 0,156 |
| 755 | 209059_s_at | EDF1                                                             | -0,359 | 0,156 |
| 756 | 222580_at   | ZNF644                                                           | -0,290 | 0,156 |

|     |             |                 |        |       |
|-----|-------------|-----------------|--------|-------|
| 757 | 210546_x_at | CTAG1A ; CTAG1B | -1,066 | 0,156 |
| 758 | 211582_x_at | LST1            | 0,614  | 0,156 |
| 759 | 203310_at   | STXBP3          | -0,263 | 0,156 |
| 760 | 212994_at   | THOC2           | 0,221  | 0,156 |
| 761 | 205203_at   | PLD1            | -0,311 | 0,156 |
| 762 | 217466_x_at | RPS2 ; SNORA64  | -0,482 | 0,156 |
| 763 | 213574_s_at | KPNB1           | 0,297  | 0,156 |
| 764 | 205131_x_at | CLEC11A         | 0,567  | 0,156 |
| 765 | 240524_x_at | ---             | 0,596  | 0,156 |
| 766 | 217152_at   | ---             | 0,516  | 0,156 |
| 767 | 226245_at   | KCTD1           | -0,232 | 0,156 |
| 768 | 219030_at   | TPRKB           | -0,230 | 0,156 |
| 769 | 202764_at   | STIM1           | -0,221 | 0,156 |
| 770 | 201256_at   | COX7A2L         | -0,179 | 0,156 |
| 771 | 202262_x_at | DDAH2           | 0,524  | 0,156 |
| 772 | 235721_at   | DTX3            | -0,454 | 0,156 |
| 773 | 200647_x_at | EIF3C ; EIF3CL  | -0,293 | 0,156 |
| 774 | 212448_at   | NEDD4L          | 0,525  | 0,156 |
| 775 | 201575_at   | SNW1            | -0,191 | 0,157 |
| 776 | 233337_s_at | SEZ6L2          | 0,713  | 0,157 |
| 777 | 205683_x_at | TPSAB1          | 0,405  | 0,157 |
| 778 | 242036_x_at | ATP2B3          | 0,543  | 0,157 |
| 779 | 219751_at   | SETD6           | 0,336  | 0,158 |
| 780 | 212658_at   | LHFPL2          | 0,344  | 0,158 |
| 781 | 236807_at   | ---             | 0,513  | 0,158 |
| 782 | 214531_s_at | SNX1            | -0,595 | 0,158 |
| 783 | 209118_s_at | TUBA1A          | 0,475  | 0,158 |
| 784 | 204795_at   | PRR3            | -0,509 | 0,158 |
| 785 | 226787_at   | ZNF18           | 0,320  | 0,158 |
| 786 | 235427_at   | CFLAR           | 0,395  | 0,158 |
| 787 | 236072_at   | ---             | 0,411  | 0,158 |
| 788 | 229004_at   | ADAMTS15        | -0,849 | 0,158 |
| 789 | 233849_s_at | ARHGAP5         | -0,391 | 0,158 |
| 790 | 207201_s_at | SLC22A1         | 0,365  | 0,158 |
| 791 | 242121_at   | ---             | 0,363  | 0,158 |
| 792 | 237402_at   | ---             | 0,451  | 0,158 |
| 793 | 231111_at   | SCYL3           | 0,406  | 0,158 |
| 794 | 225697_at   | CDK12           | 0,315  | 0,158 |
| 795 | 211261_at   | NUP214          | 0,540  | 0,158 |
| 796 | 211858_x_at | GNAS            | -0,405 | 0,158 |
| 797 | 203749_s_at | RARA            | -0,383 | 0,159 |
| 798 | 239762_at   | LOC286437       | 0,547  | 0,159 |
| 799 | 213527_s_at | ZNF688          | 0,313  | 0,159 |
| 800 | 218247_s_at | MEX3C           | -0,399 | 0,159 |
| 801 | 210835_s_at | CTBP2           | 0,438  | 0,159 |
| 802 | 233448_s_at | ---             | 0,371  | 0,159 |
| 803 | 211558_s_at | DHPS            | -0,328 | 0,160 |
| 804 | 215164_at   | ---             | 0,470  | 0,160 |
| 805 | 225921_at   | NIN             | -0,314 | 0,160 |
| 806 | 217790_s_at | SSR3            | -0,428 | 0,160 |
| 807 | 237845_at   | LOC101927552    | 0,549  | 0,160 |
| 808 | 209329_x_at | HIGD2A          | -0,300 | 0,160 |
| 809 | 225261_x_at | NELFCD          | -0,279 | 0,161 |
| 810 | 210708_x_at | CASP10          | 0,240  | 0,161 |
| 811 | 241996_at   | ---             | 0,254  | 0,161 |
| 812 | 212364_at   | MYO1B           | 0,496  | 0,161 |
| 813 | 227638_at   | EPG5            | 0,199  | 0,161 |
| 814 | 203299_s_at | AP1S2           | 0,419  | 0,161 |
| 815 | 200808_s_at | ZYX             | 0,400  | 0,162 |
| 816 | 207352_s_at | GABRB2          | 0,455  | 0,162 |
| 817 | 233080_s_at | PRPF40A         | 0,210  | 0,162 |
| 818 | 211271_x_at | MIR4745 ; PTBP1 | -0,207 | 0,162 |
| 819 | 203794_at   | CDC42BPA        | 0,548  | 0,162 |
| 820 | 226647_at   | TMEM25          | -0,418 | 0,162 |
| 821 | 201113_at   | TUFM            | -0,278 | 0,162 |
| 822 | 215541_s_at | DIAPH1          | 0,288  | 0,162 |
| 823 | 239831_at   | TMEM106C        | 0,385  | 0,162 |
| 824 | 200657_at   | SLC25A5         | -0,300 | 0,162 |
| 825 | 224579_at   | SLC38A1         | -0,422 | 0,162 |

|     |             |                                                 |        |       |
|-----|-------------|-------------------------------------------------|--------|-------|
| 826 | 212952_at   | CTC-425F1.4                                     | 0,276  | 0,162 |
| 827 | 207374_at   | PLSCR2                                          | 0,434  | 0,162 |
| 828 | 211710_x_at | RPL4 ; SNORD16 ; SNORD18A ; SNORD18B ; SNORD18C | -0,320 | 0,162 |
| 829 | 237396_at   | ---                                             | 0,467  | 0,162 |
| 830 | 207170_s_at | LETMD1                                          | -0,255 | 0,162 |
| 831 | 241694_at   | PKHD1                                           | -0,305 | 0,162 |
| 832 | 217202_s_at | GLUL                                            | 0,576  | 0,162 |
| 833 | 225678_at   | POLR3H                                          | -0,224 | 0,162 |
| 834 | 226243_at   | PTRHD1                                          | -0,391 | 0,162 |
| 835 | 223457_at   | COPG2                                           | -0,484 | 0,162 |
| 836 | 234487_at   | ---                                             | 0,276  | 0,162 |
| 837 | 233424_at   | ---                                             | 0,516  | 0,162 |
| 838 | 217606_at   | ---                                             | 0,465  | 0,162 |
| 839 | 209949_at   | NCF2                                            | 0,532  | 0,162 |
| 840 | 239861_at   | ---                                             | 0,396  | 0,162 |
| 841 | 209091_s_at | SH3GLB1                                         | -0,362 | 0,162 |
| 842 | 223335_at   | TMEM69                                          | -0,293 | 0,162 |
| 843 | 222444_at   | ARMCX3                                          | 0,296  | 0,162 |
| 844 | 236004_at   | AP5M1                                           | -0,311 | 0,162 |
| 845 | 236923_x_at | ---                                             | 0,272  | 0,162 |
| 846 | 230227_at   | RP11-333I3.1                                    | -0,555 | 0,162 |
| 847 | 221500_s_at | STX16                                           | -0,236 | 0,162 |
| 848 | 218281_at   | MRPL48                                          | -0,188 | 0,163 |
| 849 | 223344_s_at | MS4A7                                           | 0,445  | 0,163 |
| 850 | 202562_s_at | C14orf1                                         | -0,347 | 0,163 |
| 851 | 218223_s_at | PLEKHO1                                         | 0,758  | 0,164 |
| 852 | 224670_at   | SYS1                                            | -0,267 | 0,164 |
| 853 | 214726_x_at | ADD1                                            | 0,230  | 0,164 |
| 854 | 226146_at   | HEIH                                            | -0,288 | 0,164 |
| 855 | 212266_s_at | SRSF5                                           | -0,267 | 0,164 |
| 856 | 204472_at   | GEM                                             | 0,419  | 0,164 |
| 857 | 224577_at   | ERGIC1                                          | -0,392 | 0,166 |
| 858 | 214902_x_at | LPP                                             | 0,401  | 0,166 |
| 859 | 217451_at   | RP11-665C16.8                                   | 0,187  | 0,166 |
| 860 | 214167_s_at | RPLP0                                           | -0,312 | 0,167 |
| 861 | 209715_at   | CBX5                                            | 0,340  | 0,167 |
| 862 | 207364_at   | TEX28                                           | 0,155  | 0,167 |
| 863 | 222229_x_at | RP13-258O15.1 ; RPL26P37 ; RPL26P37             | -0,289 | 0,167 |
| 864 | 242593_at   | ---                                             | 0,442  | 0,167 |
| 865 | 202279_at   | C14orf2                                         | -0,231 | 0,167 |
| 866 | 221002_s_at | TSPAN14                                         | 0,232  | 0,167 |
| 867 | 216177_at   | RPL29P7 ; RPL29P7                               | -0,351 | 0,167 |
| 868 | 227072_at   | RTTN                                            | 0,241  | 0,167 |
| 869 | 216140_at   | ---                                             | 0,507  | 0,167 |
| 870 | 240234_at   | ---                                             | 0,421  | 0,167 |
| 871 | 200897_s_at | PALLD                                           | 0,563  | 0,167 |
| 872 | 215811_at   | ---                                             | 0,425  | 0,167 |
| 873 | 214173_x_at | URI1                                            | -0,253 | 0,167 |
| 874 | 211971_s_at | LRPPRC                                          | -0,193 | 0,167 |
| 875 | 221428_s_at | TBL1XR1                                         | -0,365 | 0,167 |
| 876 | 221476_s_at | RPL15                                           | -0,273 | 0,167 |
| 877 | 218088_s_at | RRAGC                                           | 0,192  | 0,167 |
| 878 | 220713_at   | DENND6B                                         | 0,324  | 0,167 |
| 879 | 224872_at   | DIP2B                                           | -0,205 | 0,168 |
| 880 | 214198_s_at | DGCR2                                           | -0,291 | 0,168 |
| 881 | 214888_at   | CAPN2                                           | 0,303  | 0,168 |
| 882 | 214186_s_at | HCG26                                           | 0,483  | 0,168 |
| 883 | 204528_s_at | NAP1L1                                          | -0,278 | 0,169 |
| 884 | 204334_at   | KLF7                                            | 0,275  | 0,169 |
| 885 | 225299_at   | MYO5B                                           | 0,281  | 0,169 |
| 886 | 208855_s_at | STK24                                           | -0,214 | 0,170 |
| 887 | 201622_at   | SND1                                            | -0,206 | 0,170 |
| 888 | 238601_at   | PHKB                                            | 0,402  | 0,170 |
| 889 | 221149_at   | C5AR2                                           | 0,418  | 0,170 |
| 890 | 211727_s_at | COX11                                           | -0,233 | 0,170 |
| 891 | 228889_at   | ARHGAP5-AS1                                     | -0,321 | 0,170 |
| 892 | 222649_at   | XPO4                                            | -0,231 | 0,170 |
| 893 | 223007_s_at | TMEM245                                         | 0,222  | 0,170 |
| 894 | 217846_at   | MIR6890 ; QARS                                  | -0,251 | 0,170 |



|     |             |                           |        |       |
|-----|-------------|---------------------------|--------|-------|
| 895 | 63825_at    | ABHD2                     | 0,344  | 0,170 |
| 896 | 203196_at   | ABCC4                     | 0,519  | 0,171 |
| 897 | 212791_at   | C1orf216                  | 0,201  | 0,171 |
| 898 | 215311_at   | NTRK3                     | 0,498  | 0,171 |
| 899 | 235575_at   | ---                       | 0,675  | 0,171 |
| 900 | 206435_at   | B4GALNT1                  | 0,427  | 0,171 |
| 901 | 220647_s_at | COA4                      | -0,258 | 0,171 |
| 902 | 206761_at   | CD96                      | 0,439  | 0,171 |
| 903 | 211487_x_at | RPS17                     | -0,274 | 0,171 |
| 904 | 209742_s_at | MYL2                      | 0,433  | 0,171 |
| 905 | 203123_s_at | SLC11A2                   | 0,280  | 0,171 |
| 906 | 218825_at   | EGFL7                     | 0,434  | 0,171 |
| 907 | 229334_at   | RUFY3                     | -0,324 | 0,172 |
| 908 | 234048_s_at | EPG5                      | 0,389  | 0,172 |
| 909 | 213160_at   | DOCK2                     | -0,237 | 0,172 |
| 910 | 232548_at   | GALNT16                   | 0,386  | 0,172 |
| 911 | 225496_s_at | SYTL2                     | 0,522  | 0,172 |
| 912 | 202189_x_at | MIR4745 ; PTBP1           | -0,194 | 0,172 |
| 913 | 212851_at   | DCUN1D4                   | 0,260  | 0,172 |
| 914 | 214586_at   | GPR37                     | 0,248  | 0,172 |
| 915 | 201781_s_at | AIP                       | -0,252 | 0,172 |
| 916 | 230212_at   | SPRY1                     | -0,351 | 0,172 |
| 917 | 212568_s_at | DLAT                      | -0,261 | 0,172 |
| 918 | 223526_at   | C18orf21                  | -0,216 | 0,172 |
| 919 | 229060_at   | YPEL2                     | 0,393  | 0,172 |
| 920 | 217774_s_at | TRMT112                   | -0,211 | 0,172 |
| 921 | 219450_at   | C4orf19                   | 0,377  | 0,173 |
| 922 | 202514_at   | DLG1                      | -0,359 | 0,173 |
| 923 | 243442_x_at | ---                       | 0,296  | 0,173 |
| 924 | 237795_s_at | SP2                       | 0,501  | 0,173 |
| 925 | 218505_at   | WDR59                     | 0,257  | 0,173 |
| 926 | 209132_s_at | COMMD4                    | -0,229 | 0,173 |
| 927 | 215078_at   | LOC100129518 ; SOD2       | 0,405  | 0,173 |
| 928 | 227328_at   | CAMTA1                    | -0,615 | 0,173 |
| 929 | 202921_s_at | ANK2                      | 0,319  | 0,173 |
| 930 | 210250_x_at | ADSL                      | -0,218 | 0,173 |
| 931 | 227413_at   | UBLCP1                    | -0,394 | 0,173 |
| 932 | 226430_at   | RELL1                     | 0,398  | 0,173 |
| 933 | 209785_s_at | PLA2G4C                   | 0,590  | 0,173 |
| 934 | 206402_s_at | NPFF                      | 0,270  | 0,174 |
| 935 | 200819_s_at | RPS15                     | -0,274 | 0,174 |
| 936 | 237194_at   | ---                       | 0,614  | 0,174 |
| 937 | 233104_at   | PABPC1L                   | -0,465 | 0,174 |
| 938 | 210933_s_at | FSCN1                     | 0,413  | 0,174 |
| 939 | 235041_at   | GOSR2                     | 0,280  | 0,174 |
| 940 | 208826_x_at | HINT1                     | -0,274 | 0,174 |
| 941 | 203386_at   | TBC1D4                    | 0,423  | 0,174 |
| 942 | 219699_at   | LGI2                      | 0,323  | 0,174 |
| 943 | 211934_x_at | GANAB                     | -0,227 | 0,174 |
| 944 | 216035_x_at | TCF7L2                    | 0,533  | 0,174 |
| 945 | 234601_x_at | ---                       | 0,326  | 0,174 |
| 946 | 230047_at   | ARHGAP42                  | -0,663 | 0,174 |
| 947 | 200902_at   | 42248                     | -0,353 | 0,174 |
| 948 | 201056_at   | GOLGB1                    | 0,243  | 0,174 |
| 949 | 219348_at   | USE1                      | -0,476 | 0,174 |
| 950 | 228281_at   | DDIAS                     | -0,358 | 0,174 |
| 951 | 220768_s_at | CSNK1G3                   | -0,346 | 0,174 |
| 952 | 217757_at   | A2M                       | 0,652  | 0,174 |
| 953 | 221173_at   | USH1C                     | 0,418  | 0,174 |
| 954 | 203719_at   | ERCC1                     | -0,219 | 0,174 |
| 955 | 203910_at   | ARHGAP29                  | 0,374  | 0,174 |
| 956 | 229050_s_at | SNHG7 ; SNORA17 ; SNORA43 | -0,431 | 0,174 |
| 957 | 206109_at   | FUT1                      | 0,408  | 0,174 |
| 958 | 219739_at   | RNF186                    | 0,399  | 0,174 |
| 959 | 217634_at   | SVIL                      | 0,527  | 0,174 |
| 960 | 237901_at   | ---                       | 0,542  | 0,174 |
| 961 | 202404_s_at | COL1A2                    | 0,618  | 0,174 |
| 962 | 208833_s_at | ATXN10                    | -0,210 | 0,174 |
| 963 | 226048_at   | MAPK8                     | 0,251  | 0,174 |

|      |             |                     |        |       |
|------|-------------|---------------------|--------|-------|
| 964  | 232241_at   | LINC00894           | -0,532 | 0,174 |
| 965  | 221524_s_at | RRAGD               | -0,471 | 0,175 |
| 966  | 212487_at   | GPATCH8             | 0,226  | 0,175 |
| 967  | 226056_at   | ARHGAP31            | 0,397  | 0,176 |
| 968  | 216894_x_at | CDKN1C              | 0,590  | 0,176 |
| 969  | 216581_at   | KRT18P38 ; KRT18P38 | 0,384  | 0,176 |
| 970  | 229840_at   | IQSEC2              | 0,382  | 0,176 |
| 971  | 202785_at   | NDUFA7              | -0,380 | 0,176 |
| 972  | 217866_at   | CPSF7               | -0,185 | 0,176 |
| 973  | 213321_at   | BCKDHB              | 0,383  | 0,176 |
| 974  | 212109_at   | HN1L                | 0,469  | 0,176 |
| 975  | 200929_at   | TMED10              | -0,335 | 0,176 |
| 976  | 209058_at   | EDF1                | -0,292 | 0,176 |
| 977  | 240998_at   | ---                 | 0,448  | 0,176 |
| 978  | 227749_at   | POU2F2              | 0,302  | 0,176 |
| 979  | 238692_at   | BTBD11              | -0,469 | 0,176 |
| 980  | 237549_at   | ---                 | 0,464  | 0,176 |
| 981  | 209485_s_at | OSBPL1A             | 0,713  | 0,176 |
| 982  | 236766_at   | ---                 | 0,357  | 0,177 |
| 983  | 203739_at   | ZNF217              | -0,442 | 0,177 |
| 984  | 215390_at   | ---                 | 0,418  | 0,177 |
| 985  | 204144_s_at | PIGQ                | 0,308  | 0,177 |
| 986  | 201784_s_at | C11orf58            | -0,237 | 0,177 |
| 987  | 222810_s_at | RASAL2              | 0,526  | 0,177 |
| 988  | 213481_at   | S100A13             | 0,328  | 0,177 |
| 989  | 217530_at   | SLC34A1             | 0,452  | 0,177 |
| 990  | 212449_s_at | LYPLA1              | -0,272 | 0,177 |
| 991  | 241505_at   | ---                 | 0,616  | 0,177 |
| 992  | 243446_at   | AJUBA               | 0,566  | 0,177 |
| 993  | 204129_at   | BCL9                | -0,309 | 0,177 |
| 994  | 201600_at   | PHB2                | -0,232 | 0,177 |
| 995  | 213490_s_at | MAP2K2              | -0,467 | 0,177 |
| 996  | 216665_s_at | LOC101929148        | 0,324  | 0,177 |
| 997  | 31874_at    | GAS2L1              | 0,435  | 0,177 |
| 998  | 208003_s_at | NFAT5               | 0,294  | 0,177 |
| 999  | 203241_at   | UVRAG               | -0,252 | 0,177 |
| 1000 | 206782_s_at | DNAJC4              | -0,243 | 0,177 |
| 1001 | 218774_at   | DCPS                | -0,298 | 0,177 |
| 1002 | 209009_at   | ESD                 | -0,231 | 0,177 |
| 1003 | 240354_at   | C12orf54            | 0,457  | 0,177 |
| 1004 | 236718_at   | MYO10               | 0,461  | 0,177 |
| 1005 | 219290_x_at | DAPP1               | 0,285  | 0,178 |
| 1006 | 239859_x_at | ATP5S               | -0,456 | 0,178 |
| 1007 | 206206_at   | CD180               | 0,685  | 0,178 |
| 1008 | 219448_at   | TMEM70              | -0,488 | 0,178 |
| 1009 | 209965_s_at | RAD51D              | 0,261  | 0,178 |
| 1010 | 203508_at   | TNFRSF1B            | 0,550  | 0,178 |
| 1011 | 215930_s_at | CTAGE5              | 0,287  | 0,178 |
| 1012 | 204549_at   | IKBKE               | 0,240  | 0,179 |
| 1013 | 224036_s_at | LMBR1               | -0,406 | 0,179 |
| 1014 | 206377_at   | FOXF2               | 0,298  | 0,179 |
| 1015 | 237377_at   | ---                 | 0,466  | 0,179 |
| 1016 | 230076_at   | PITPNM3             | 0,376  | 0,179 |
| 1017 | 209636_at   | NFKB2               | 0,671  | 0,179 |
| 1018 | 222986_s_at | SHISA5              | -0,302 | 0,179 |
| 1019 | 212038_s_at | VDAC1               | -0,250 | 0,179 |
| 1020 | 213397_x_at | RNASE4              | 0,527  | 0,179 |
| 1021 | 211052_s_at | TBCD                | 0,567  | 0,179 |
| 1022 | 209066_x_at | UQCRB               | -0,246 | 0,179 |
| 1023 | 204743_at   | TAGLN3              | 0,329  | 0,179 |
| 1024 | 204546_at   | KIAA0513            | 0,635  | 0,179 |
| 1025 | 220991_s_at | RNF32               | 0,324  | 0,179 |
| 1026 | 204910_s_at | TRIM3               | 0,276  | 0,180 |
| 1027 | 233083_at   | MTHFD2L             | 0,396  | 0,180 |
| 1028 | 232247_at   | ZNF502              | -0,305 | 0,180 |
| 1029 | 216644_at   | ---                 | 0,450  | 0,180 |
| 1030 | 226208_at   | ZSWIM6              | -0,319 | 0,180 |
| 1031 | 216625_at   | ---                 | 0,366  | 0,180 |
| 1032 | 201922_at   | NSA2                | -0,285 | 0,180 |

|      |             |                                                             |        |       |
|------|-------------|-------------------------------------------------------------|--------|-------|
| 1033 | 202709_at   | FMOD                                                        | 0,205  | 0,180 |
| 1034 | 217773_s_at | NDUFA4                                                      | -0,287 | 0,180 |
| 1035 | 210102_at   | VWA5A                                                       | 0,428  | 0,180 |
| 1036 | 216775_at   | USP53                                                       | 0,267  | 0,180 |
| 1037 | 223290_at   | PDXP ; SH3BP1                                               | -0,377 | 0,180 |
| 1038 | 224141_at   | FLJ38668                                                    | 0,230  | 0,180 |
| 1039 | 236217_at   | SLC31A1                                                     | 0,524  | 0,180 |
| 1040 | 201919_at   | SLC25A36                                                    | -0,152 | 0,180 |
| 1041 | 217256_x_at | RP3-507I15.1                                                | -0,290 | 0,180 |
| 1042 | 204232_at   | FCER1G                                                      | 0,342  | 0,180 |
| 1043 | 36865_at    | ANGEL1                                                      | -0,283 | 0,180 |
| 1044 | 224917_at   | MIR21 ; VMP1                                                | 0,512  | 0,180 |
| 1045 | 204249_s_at | LMO2                                                        | 0,613  | 0,180 |
| 1046 | 226313_at   | C10orf35                                                    | 0,544  | 0,180 |
| 1047 | 241584_at   | ---                                                         | 0,227  | 0,180 |
| 1048 | 207476_at   | LOC100507630                                                | 0,192  | 0,180 |
| 1049 | 242239_at   | NSUN6                                                       | 0,290  | 0,180 |
| 1050 | 210092_at   | MAGOH ; MAGOHB                                              | -0,296 | 0,180 |
| 1051 | 225147_at   | CYTH3                                                       | 0,566  | 0,180 |
| 1052 | 211310_at   | EZH1                                                        | 0,399  | 0,182 |
| 1053 | 201516_at   | SRM                                                         | -0,283 | 0,182 |
| 1054 | 216471_x_at | SSX2 ; SSX2B                                                | -0,747 | 0,183 |
| 1055 | 203197_s_at | C1orf123                                                    | -0,479 | 0,183 |
| 1056 | 230611_at   | SYPL2                                                       | 0,215  | 0,183 |
| 1057 | 217983_s_at | RNASET2                                                     | -0,539 | 0,183 |
| 1058 | 221973_at   | LOC100506076 ; LOC100506123                                 | 0,414  | 0,183 |
| 1059 | 222785_x_at | C11orf1                                                     | -0,370 | 0,183 |
| 1060 | 201504_s_at | TSN                                                         | -0,550 | 0,183 |
| 1061 | 202008_s_at | NID1                                                        | 0,340  | 0,184 |
| 1062 | 206849_at   | GABRG2                                                      | -0,458 | 0,184 |
| 1063 | 218972_at   | TTC17                                                       | -0,197 | 0,184 |
| 1064 | 201828_x_at | FAM127A                                                     | 0,172  | 0,184 |
| 1065 | 200707_at   | PRKCSH                                                      | -0,297 | 0,184 |
| 1066 | 203034_s_at | RPL27A ; SNORA45A                                           | -0,207 | 0,184 |
| 1067 | 200799_at   | HSPA1A ; HSPA1B                                             | 0,584  | 0,184 |
| 1068 | 207721_x_at | HINT1                                                       | -0,315 | 0,184 |
| 1069 | 209197_at   | SYT11                                                       | 0,403  | 0,184 |
| 1070 | 205479_s_at | PLAU                                                        | 0,385  | 0,184 |
| 1071 | 37170_at    | BMP2K                                                       | 0,479  | 0,184 |
| 1072 | 220592_at   | CCDC40                                                      | 0,292  | 0,184 |
| 1073 | 203897_at   | LYRM1                                                       | -0,230 | 0,184 |
| 1074 | 215830_at   | BC127192 ; SHANK2                                           | 0,342  | 0,184 |
| 1075 | 228328_at   | KLHL28                                                      | -0,360 | 0,184 |
| 1076 | 225222_at   | HIAT1                                                       | -0,321 | 0,185 |
| 1077 | 203561_at   | FCGR2A                                                      | 0,478  | 0,185 |
| 1078 | 222209_s_at | TMEM135                                                     | -0,436 | 0,185 |
| 1079 | 211587_x_at | CHRNA3                                                      | 0,352  | 0,185 |
| 1080 | 208018_s_at | HCK                                                         | 0,482  | 0,185 |
| 1081 | 221765_at   | UGCG                                                        | 0,362  | 0,185 |
| 1082 | 215588_x_at | RIOK3                                                       | 0,366  | 0,185 |
| 1083 | 211991_s_at | HLA-DPA1                                                    | 0,743  | 0,185 |
| 1084 | 222235_s_at | CSGALNACT2                                                  | -0,372 | 0,185 |
| 1085 | 201069_at   | MMP2                                                        | 0,437  | 0,185 |
| 1086 | 213947_s_at | NUP210                                                      | -0,288 | 0,186 |
| 1087 | 32069_at    | N4BP1                                                       | 0,319  | 0,186 |
| 1088 | 220646_s_at | KLRF1                                                       | 0,444  | 0,187 |
| 1089 | 229563_s_at | RPL10A                                                      | -0,267 | 0,187 |
| 1090 | 227200_at   | ETV3                                                        | -0,290 | 0,187 |
| 1091 | 242540_at   | DNHD1                                                       | 0,394  | 0,187 |
| 1092 | 213572_s_at | SERPINB1                                                    | 0,279  | 0,187 |
| 1093 | 212241_at   | GCOM1 ; MYZAP ; POLR2M                                      | -0,227 | 0,188 |
| 1094 | 207912_s_at | DAZ1 ; DAZ2 ; DAZ3 ; DAZ4                                   | -0,472 | 0,188 |
| 1095 | 222646_s_at | ERO1L                                                       | -0,344 | 0,188 |
| 1096 | 202587_s_at | AK1                                                         | 0,354  | 0,189 |
| 1097 | 220940_at   | ANKRD36B                                                    | 0,501  | 0,189 |
| 1098 | 213222_at   | PLCB1                                                       | -0,500 | 0,189 |
| 1099 | 210340_s_at | CSF2RA                                                      | 0,354  | 0,189 |
| 1100 | 214574_x_at | LST1                                                        | 0,560  | 0,189 |
| 1101 | 210646_x_at | RPL13A ; RPL13AP5 ; SNORD32A ; SNORD33 ; SNORD34 ; SNORD35A | -0,251 | 0,189 |

|      |             |                             |        |       |
|------|-------------|-----------------------------|--------|-------|
| 1102 | 219319_at   | HIF3A                       | 0,329  | 0,189 |
| 1103 | 222780_s_at | BAALC                       | -0,224 | 0,189 |
| 1104 | 212977_at   | ACKR3                       | 0,488  | 0,190 |
| 1105 | 205488_at   | GZMA                        | 0,455  | 0,190 |
| 1106 | 216515_x_at | MIR1244-3                   | -0,283 | 0,190 |
| 1107 | 212343_at   | YIPF6                       | 0,503  | 0,191 |
| 1108 | 218826_at   | SLC35F2                     | -0,352 | 0,191 |
| 1109 | 243913_at   | ---                         | 0,262  | 0,191 |
| 1110 | 236279_at   | ---                         | 0,529  | 0,191 |
| 1111 | 215001_s_at | GLUL                        | 0,557  | 0,191 |
| 1112 | 217515_s_at | CACNA1S                     | 0,489  | 0,191 |
| 1113 | 223231_at   | TATDN1                      | -0,276 | 0,191 |
| 1114 | 230560_at   | STXBP6                      | -0,646 | 0,191 |
| 1115 | 227265_at   | FGL2                        | 0,675  | 0,191 |
| 1116 | 229108_at   | ---                         | -0,244 | 0,191 |
| 1117 | 200810_s_at | CIRBP                       | -0,315 | 0,191 |
| 1118 | 223710_at   | CCL26                       | -0,387 | 0,191 |
| 1119 | 224932_at   | CHCHD10                     | -0,370 | 0,191 |
| 1120 | 217654_at   | CFLAR                       | 0,331  | 0,191 |
| 1121 | 222791_at   | RSBN1                       | -0,260 | 0,191 |
| 1122 | 241640_at   | BCAP29                      | 0,472  | 0,191 |
| 1123 | 225452_at   | MED1                        | 0,155  | 0,191 |
| 1124 | 202300_at   | LAMTOR5                     | -0,182 | 0,191 |
| 1125 | 200892_s_at | TRA2B                       | -0,207 | 0,192 |
| 1126 | 228055_at   | NAPSB                       | 0,453  | 0,192 |
| 1127 | 223423_at   | GPR160                      | -0,459 | 0,192 |
| 1128 | 224261_at   | ---                         | 0,260  | 0,193 |
| 1129 | 216246_at   | ---                         | -0,203 | 0,193 |
| 1130 | 224395_s_at | RNF7                        | -0,315 | 0,193 |
| 1131 | 236152_at   | PAGE5                       | -0,499 | 0,193 |
| 1132 | 210371_s_at | RBBP4                       | -0,264 | 0,193 |
| 1133 | 201954_at   | ARPC1B                      | 0,294  | 0,193 |
| 1134 | 243996_at   | RP11-112J3.16               | -0,371 | 0,193 |
| 1135 | 208986_at   | TCF12                       | -0,216 | 0,193 |
| 1136 | 216449_x_at | HSP90B1                     | 0,482  | 0,193 |
| 1137 | 200689_x_at | EEF1G ; MIR3654             | -0,242 | 0,193 |
| 1138 | 243880_at   | GOSR2                       | 0,538  | 0,193 |
| 1139 | 223189_x_at | KMT2E                       | -0,184 | 0,193 |
| 1140 | 229989_at   | FDXACB1                     | -0,263 | 0,193 |
| 1141 | 214421_x_at | CYP2C9                      | 0,300  | 0,193 |
| 1142 | 206093_x_at | TNXA ; TNXB                 | 0,575  | 0,193 |
| 1143 | 243674_at   | LOC102723678 ; LOC102723709 | 0,489  | 0,194 |
| 1144 | 209786_at   | HMGNA4                      | -0,273 | 0,194 |
| 1145 | 201362_at   | IVNS1ABP                    | 0,254  | 0,194 |
| 1146 | 222789_at   | RSBN1                       | -0,188 | 0,194 |
| 1147 | 201012_at   | ANXA1                       | 0,670  | 0,194 |
| 1148 | 205386_s_at | MDM2                        | 0,405  | 0,194 |
| 1149 | 201087_at   | PXN                         | 0,255  | 0,194 |
| 1150 | 215668_s_at | PLXNB1                      | -0,403 | 0,194 |
| 1151 | 221172_at   | C7orf69                     | 0,384  | 0,194 |
| 1152 | 239707_at   | SLC5A10                     | 0,465  | 0,195 |
| 1153 | 241220_at   | ---                         | 0,531  | 0,195 |
| 1154 | 214434_at   | HSPA12A                     | 0,465  | 0,195 |
| 1155 | 227498_at   | SOX6                        | 0,590  | 0,195 |
| 1156 | 220586_at   | CHD9                        | 0,324  | 0,195 |
| 1157 | 213776_at   | LOC157562                   | 0,495  | 0,195 |
| 1158 | 219130_at   | TRMT13                      | -0,285 | 0,195 |
| 1159 | 231985_at   | MICAL3                      | -0,491 | 0,195 |
| 1160 | 221225_at   | DCAKD                       | 0,360  | 0,195 |
| 1161 | 200986_at   | SERPING1                    | 0,576  | 0,195 |
| 1162 | 214572_s_at | INSL3                       | 0,421  | 0,195 |
| 1163 | 207343_at   | LYZL6                       | 0,324  | 0,195 |
| 1164 | 226386_at   | MALSU1                      | -0,291 | 0,195 |
| 1165 | 210650_s_at | PCLO                        | 0,376  | 0,195 |
| 1166 | 209411_s_at | GGA3                        | 0,240  | 0,195 |
| 1167 | 236110_at   | ST8SIA5                     | 0,475  | 0,195 |
| 1168 | 212924_s_at | LSM4                        | 0,325  | 0,195 |
| 1169 | 239729_at   | RP5-1085F17.3               | -0,496 | 0,195 |
| 1170 | 214027_x_at | DES ; SUPT20H               | 0,339  | 0,196 |

|      |             |                                                      |        |       |
|------|-------------|------------------------------------------------------|--------|-------|
| 1171 | 206143_at   | SLC26A3                                              | 0,281  | 0,196 |
| 1172 | 205361_s_at | PFDN4                                                | -0,239 | 0,196 |
| 1173 | 39313_at    | WNK1                                                 | 0,350  | 0,196 |
| 1174 | 206506_s_at | SUPT3H                                               | -0,474 | 0,196 |
| 1175 | 39835_at    | SBF1                                                 | -0,333 | 0,196 |
| 1176 | 220447_at   | HRH3                                                 | 0,143  | 0,196 |
| 1177 | 220061_at   | ACSM5                                                | 0,389  | 0,196 |
| 1178 | 230211_at   | TRIP11                                               | -0,449 | 0,197 |
| 1179 | 210722_at   | PNLIPRP1                                             | 0,359  | 0,197 |
| 1180 | 221698_s_at | CLEC7A                                               | 0,623  | 0,197 |
| 1181 | 213992_at   | COL4A6                                               | -0,465 | 0,197 |
| 1182 | 213801_x_at | RPSA ; RPSAP19 ; RPSAP58 ; RPSAP9 ; SNORA6 ; SNORA62 | -0,269 | 0,197 |
| 1183 | 211328_x_at | HFE                                                  | 0,210  | 0,197 |
| 1184 | 212256_at   | GALNT10                                              | 0,339  | 0,197 |
| 1185 | 212923_s_at | PXDC1                                                | 0,543  | 0,197 |
| 1186 | 226273_at   | CLCN5                                                | 0,177  | 0,198 |
| 1187 | 205158_at   | RNASE4                                               | 0,476  | 0,198 |
| 1188 | 209513_s_at | HSDL2                                                | 0,396  | 0,198 |
| 1189 | 215932_at   | MAGEC2                                               | 0,503  | 0,198 |
| 1190 | 204276_at   | TK2                                                  | 0,338  | 0,198 |
| 1191 | 232940_s_at | KMT2C                                                | 0,304  | 0,199 |
| 1192 | 219474_at   | C3orf52                                              | -0,485 | 0,199 |
| 1193 | 203621_at   | NDUFB5                                               | -0,271 | 0,199 |
| 1194 | 219315_s_at | TMEM204                                              | 0,272  | 0,199 |
| 1195 | 235092_at   | ---                                                  | -0,469 | 0,199 |
| 1196 | 210491_at   | ---                                                  | 0,347  | 0,199 |
| 1197 | 221604_s_at | PEX16                                                | -0,380 | 0,199 |
| 1198 | 202027_at   | TMEM184B                                             | -0,407 | 0,199 |
| 1199 | 203146_s_at | GABBR1                                               | 0,409  | 0,199 |
| 1200 | 217333_at   | KRT18P44 ; KRT18P44                                  | 0,125  | 0,199 |
| 1201 | 213067_at   | MYH10                                                | 0,549  | 0,199 |
| 1202 | 212042_x_at | RPL7                                                 | -0,219 | 0,199 |
| 1203 | 219252_s_at | GEMIN8                                               | 0,271  | 0,199 |
| 1204 | 232071_at   | MRPL19                                               | 0,454  | 0,199 |
| 1205 | 201137_s_at | HLA-DPB1                                             | 0,524  | 0,199 |
| 1206 | 216316_x_at | RP11-548H18.2                                        | 0,452  | 0,199 |
| 1207 | 211164_at   | EPHA3                                                | 0,321  | 0,199 |
| 1208 | 225865_x_at | NELFCD                                               | -0,229 | 0,199 |
| 1209 | 229796_at   | SIX4                                                 | -0,500 | 0,199 |
| 1210 | 238433_at   | SNX5                                                 | -0,452 | 0,200 |
| 1211 | 200910_at   | CCT3 ; LOC101927137                                  | -0,276 | 0,200 |

Supplementary table 7. KEGG gene sets significantly down in bortezomib responders

| KEGG pathway                                         | Size gene set | ES           | NES          | NOM p-val    | FDR q-val    | FWER p-val   |
|------------------------------------------------------|---------------|--------------|--------------|--------------|--------------|--------------|
| <b>RIBOSOME</b>                                      | <b>65</b>     | <b>-0,71</b> | <b>-2,93</b> | <b>0,000</b> | <b>0,000</b> | <b>0,000</b> |
| OXIDATIVE PHOSPHORYLATION                            | 105           | -0,56        | -2,56        | 0,000        | 0,000        | 0,000        |
| PARKINSONS DISEASE                                   | 104           | -0,51        | -2,29        | 0,000        | 0,000        | 0,001        |
| HUNTINGTONS DISEASE                                  | 163           | -0,45        | -2,21        | 0,000        | 0,001        | 0,002        |
| PENTOSE PHOSPHATE PATHWAY                            | 26            | -0,62        | -2,05        | 0,000        | 0,002        | 0,010        |
| ALZHEIMERS DISEASE                                   | 147           | -0,42        | -1,98        | 0,000        | 0,004        | 0,019        |
| CITRATE CYCLE TCA CYCLE                              | 29            | -0,54        | -1,89        | 0,003        | 0,009        | 0,056        |
| PROTEIN EXPORT                                       | 19            | -0,57        | -1,80        | 0,008        | 0,017        | 0,121        |
| RNA POLYMERASE                                       | 28            | -0,52        | -1,78        | 0,000        | 0,019        | 0,142        |
| RNA DEGRADATION                                      | 50            | -0,45        | -1,75        | 0,000        | 0,022        | 0,186        |
| GLYCOSYLPHOSPHATIDYLINOSITOL GPI ANCHOR BIOSYNTHESIS | 23            | -0,48        | -1,58        | 0,027        | 0,074        | 0,511        |
| N GLYCAN BIOSYNTHESIS                                | 39            | -0,41        | -1,54        | 0,021        | 0,089        | 0,613        |
| PYRUVATE METABOLISM                                  | 39            | -0,41        | -1,49        | 0,044        | 0,116        | 0,742        |
| AMINOACYL TRNA BIOSYNTHESIS                          | 31            | -0,42        | -1,46        | 0,051        | 0,136        | 0,828        |
| SPLICEOSOME                                          | 92            | -0,32        | -1,39        | 0,013        | 0,198        | 0,934        |

Supplementary table 8. Positional gene sets significantly down in bortezomib responders

| CHR region     | Size gene set | ES           | NES          | NOM p-val    | FDR q-val    | FWER p-val   |
|----------------|---------------|--------------|--------------|--------------|--------------|--------------|
| CHR14Q22       | 36            | -0,49        | -1,79        | 0,003        | 0,050        | 0,183        |
| CHR11Q13       | 197           | -0,36        | -1,79        | 0,000        | 0,066        | 0,183        |
| CHR14Q24       | 70            | -0,42        | -1,81        | 0,000        | 0,086        | 0,163        |
| CHR5Q14        | 32            | -0,47        | -1,65        | 0,009        | 0,102        | 0,510        |
| CHR15Q23       | 23            | -0,52        | -1,69        | 0,012        | 0,103        | 0,411        |
| CHR7P21        | 29            | -0,48        | -1,63        | 0,012        | 0,108        | 0,585        |
| CHR15Q14       | 34            | -0,46        | -1,65        | 0,012        | 0,119        | 0,510        |
| <b>CHR1P22</b> | <b>61</b>     | <b>-0,39</b> | <b>-1,56</b> | <b>0,011</b> | <b>0,156</b> | <b>0,756</b> |
| CHR14Q13       | 21            | -0,58        | -1,82        | 0,009        | 0,159        | 0,151        |
| CHR7P22        | 41            | -0,39        | -1,49        | 0,043        | 0,197        | 0,905        |
